# Supplementary material
Source: PubMed Central journal article supplement (PMC4441556)
Supplement: NIHMS675689-supplement-Supplemental_material.pdf [file NIHMS675689-supplement-Supplemental_material.pdf]

## DATA SUPPLEMENT

### **A myocardial infarction-associated SNP at 6p24 interferes with MEF2 binding and associates with *PHACTR1* expression levels in human coronary arteries**

Mélissa Beaudoin<sup>1,\*</sup>, Rajat M. Gupta<sup>2,3,\*</sup>, Hong-Hee Won<sup>4-7</sup>, Ken Sin Lo<sup>1</sup>, Ron Do<sup>4-7</sup>, Christopher A. Henderson<sup>2</sup>, Claire Lavoie-St-Amour<sup>1</sup>, Simon Langlois<sup>1</sup>, Daniel Rivas<sup>8</sup>, Stéphanie Lehoux<sup>8</sup>, Sekar Kathiresan<sup>4-7</sup>, Jean-Claude Tardif<sup>1,9</sup>, Kiran Musunuru<sup>2,3</sup>, Guillaume Lettre<sup>1,9</sup>

#### **Affiliations**

<sup>1</sup>Montreal Heart Institute, 5000 Bélanger Street, Montréal, Québec, H1T 1C8, Canada.

<sup>2</sup>Department of Stem Cell and Regenerative Biology, Harvard University, and Harvard Stem Cell Institute, Cambridge, Massachusetts 02138, USA.

<sup>3</sup>Division of Cardiovascular Medicine, Brigham and Women's Hospital, Boston, Massachusetts 02115, USA.

<sup>4</sup>Center of Human Genetic Research, Massachusetts General Hospital, Boston, MA, USA.

<sup>5</sup>Cardiovascular Research Center, Massachusetts General Hospital, Boston, MA, USA.

<sup>6</sup>Department of Medicine, Harvard Medical School, Boston, MA, USA.

<sup>7</sup>Program in Medical and Population Genetics, Broad Institute, Cambridge, MA, USA.

<sup>8</sup>Lady Davis Institute for Medical Research, McGill University, 3755 Côte Sainte-Catherine, Montreal, Quebec, H3T 1E2, Canada.

<sup>9</sup>Université de Montréal, 2900 Boul. Édouard-Montpetit, Montréal, Québec, H3T 1J4, Canada.

\*These authors contributed equally to this work.

#### **Corresponding author**

Guillaume Lettre, Tel: 514-376-3330, Fax: 514-593-2539, Email: [guillaume.lettre@umontreal.ca](mailto:guillaume.lettre@umontreal.ca).

## Supplemental Methods

### Western blot

HUVEC treated or not with VEGF or with siRNA were washed twice with PBS and then incubated 30 min on ice with 200 $\mu$ L of lysis buffer (100mM Tris pH8, 300mM NaCl, 0.2% SDS, 2% NP-40 and 0.5% NaDeoxycholate). We centrifuged the lysate for 10 min at maximum speed at 4°C and we measured protein concentration using the Bradford assay. After separation by SDS-PAGE, we transferred proteins on nitrocellulose membranes (0.2 $\mu$ M from Biorad) and incubated them with the appropriate antibodies diluted in TBS-T + milk 5%: PHACTR1 1:1000 from Sigma-Aldrich, Phospho-p44/42 MAPK 1:4000 from Cell Signaling, MEF2 1:1000 from Santa Cruz,  $\beta$ -actin 1:3000 from Sigma-Aldrich and ECL anti-rabbit IgG-HRP 1:10,000 from Amersham. For detection, we used the Western Lightning Plus kit from Perkin Elmer.

**Supplemental Table I.** Characteristics of study participants selected from the Montreal Heart Institute (MHI) Biobank. See Materials and Methods for a description of the inclusion and exclusion criteria. Values with '±' are means and standard deviations.

<sup>1</sup>Mean age at first myocardial infarction (MI) for cases and at baseline for controls.

<sup>2</sup>Hypertension is defined as a previous diagnosis of hypertension, on antihypertensive therapy or with systolic blood pressure  $\geq 140$  mmHg or diastolic blood pressure  $\geq 90$  mmHg. <sup>3</sup>Diabetes mellitus is defined as a previous diagnosis of diabetes or treatment with antidiabetic drugs. <sup>4</sup>Hypercholesterolemia is defined as a previous diagnosis of hypercholesterolemia or treatment with lipid-lowering drugs.

| Characteristics                       | MHI Biobank myocardial infarction (MI) DNA panel |             |
|---------------------------------------|--------------------------------------------------|-------------|
|                                       | Cases                                            | Controls    |
| N                                     | 1176                                             | 1996        |
| Mean age (years) <sup>1</sup>         | 54.5 ± 10.7                                      | 60.5 ± 12.0 |
| Female gender (%)                     | 20.9                                             | 57.2        |
| Ever smoking (%)                      | 79.0                                             | 59.2        |
| Hypertension (%) <sup>2</sup>         | 69.1                                             | 38.4        |
| Systolic blood pressure (mmHg)        | 124 ± 17                                         | 127 ± 16    |
| Diastolic blood pressure (mmHg)       | 71 ± 10                                          | 75 ± 9      |
| Type 2 diabetes (%) <sup>3</sup>      | 26.9                                             | 9.2         |
| Hypercholesterolemia (%) <sup>4</sup> | 89.2                                             | 39.5        |
| LDL-cholesterol (mmol/L)              | 2.86 ± 0.85                                      | 2.06 ± 0.70 |
| HDL-cholesterol (mmol/L)              | 1.36 ± 0.36                                      | 1.10 ± 0.28 |
| Body mass index (kg/m <sup>2</sup> )  | 29.0 ± 6.1                                       | 27.7 ± 6.1  |

**Supplemental Table II.** Association results between 45 validated myocardial infarction (MI) and/or coronary artery disease (CAD) SNPs and MI status in 1176 MI cases and 1996 controls selected from the Montreal Heart Institute (MHI) Biobank. Genotyping was performed with the Sequenom iPLEX platform or the Illumina HumanExome Beadchip. Individuals with >10% missing genotypes and markers with >5% missing genotypes or a Hardy-Weinberg  $P < 0.001$  were removed from the analysis. Analysis was performed in PLINK<sup>1</sup> using logistic regression under an additive genetic model and adjusting for sex, age, age-squared, hypertension, diabetes and lipid-lowering drugs usage. <sup>a</sup>We provide the Bonferonni-corrected P-value for 45 SNPs tested. <sup>b</sup>The effect of a SNP is in the right direction if the odds ratio for the effect allele is in the same direction than the published literature. Under the null hypothesis, you expect 50% of the SNPs to be in the right direction, but we observe 78% (35/45). <sup>c</sup>A SNP scores “yes” in this column if the odds ratio for the effect allele is consistent with the published literature and if the uncorrected one-tailed P-value  $< 0.05$ . Under the null, we expect 5% of the SNP to score yes (1.75/35 SNPs) and we found 34% (12/35 SNPs).

| Locus           | Chr | SNP        | Pos (hg19) | Effect allele | Odds ratio | P-value | Adjusted P-value <sup>a</sup> | Right Direction <sup>b</sup> | One-tailed $P < 0.05^c$ |
|-----------------|-----|------------|------------|---------------|------------|---------|-------------------------------|------------------------------|-------------------------|
| PCSK9           | 1   | rs11206510 | 55496039   | G             | 0.9781     | 0.8011  | 1                             | yes                          | no                      |
| PPAP2B          | 1   | rs17114036 | 56962821   | G             | 1.058      | 0.6341  | 1                             | no                           | no                      |
| SORT1           | 1   | rs602633   | 109821511  | A             | 0.8487     | 0.0589  | 1                             | yes                          | yes                     |
| IL6R            | 1   | rs4845625  | 154422067  | A             | 1.012      | 0.8629  | 1                             | yes                          | no                      |
| MIA3            | 1   | rs17465637 | 222823529  | A             | 0.9185     | 0.2627  | 1                             | yes                          | no                      |
| AKO97927        | 2   | rs16986953 | 19942473   | A             | 1.214      | 0.1451  | 1                             | yes                          | no                      |
| APOB            | 2   | rs515135   | 21286057   | A             | 1.243      | 0.01069 | 0.48                          | no                           | no                      |
| ABCG5/ABCG8     | 2   | rs6544713  | 44073881   | A             | 1.133      | 0.09291 | 1                             | yes                          | yes                     |
| GGCX/VAMP8      | 2   | rs1561198  | 85809989   | A             | 1.093      | 0.1963  | 1                             | yes                          | no                      |
| ZEB2-AC074093.1 | 2   | rs2252641  | 145801461  | G             | 1.126      | 0.0926  | 1                             | yes                          | yes                     |
| WDR12           | 2   | rs6725887  | 203454130  | C             | 1.278      | 0.01128 | 0.51                          | yes                          | yes                     |
| MRAS            | 3   | rs9818870  | 139604812  | T             | 0.9073     | 0.3055  | 1                             | no                           | no                      |
| GUCY1A3         | 4   | rs7692387  | 156635309  | A             | 0.9573     | 0.6097  | 1                             | yes                          | no                      |
| SLC22A4/SLC22A5 | 5   | rs273909   | 131667353  | G             | 1.236      | 0.05243 | 1                             | yes                          | yes                     |
| PHACTR1         | 6   | rs12526453 | 12927544   | G             | 0.7882     | 8.4E-04 | 0.038                         | yes                          | yes                     |
| ANKS1A          | 6   | rs17609940 | 35034800   | C             | 0.9541     | 0.5963  | 1                             | yes                          | no                      |
| KCNK5           | 6   | rs10947789 | 39174922   | G             | 0.9384     | 0.4418  | 1                             | yes                          | no                      |
| TCF21           | 6   | rs12190287 | 134214525  | G             | 0.83       | 0.01138 | 0.51                          | yes                          | yes                     |
| LPA             | 6   | rs3798220  | 160881127  | C             | 0.8201     | 0.3523  | 1                             | no                           | no                      |
| PLG             | 6   | rs4252120  | 161143608  | G             | 1.038      | 0.6344  | 1                             | no                           | no                      |
| HDAC9           | 7   | rs2023938  | 19036775   | G             | 1.021      | 0.8524  | 1                             | yes                          | no                      |
| Tq22            | 7   | rs10953541 | 107244545  | T             | 0.8675     | 0.0808  | 1                             | yes                          | yes                     |
| ZC3HC1          | 7   | rs11556924 | 129663496  | T             | 0.9015     | 0.1497  | 1                             | yes                          | no                      |
| LPL             | 8   | rs264      | 19813180   | A             | 0.94       | 0.5238  | 1                             | yes                          | no                      |
| TRIB1           | 8   | rs2954029  | 126490972  | T             | 0.9905     | 0.8893  | 1                             | yes                          | no                      |
| CDKN2A/CDKN2B   | 9   | rs4977574  | 22098574   | A             | 0.9196     | 0.2308  | 1                             | yes                          | no                      |
| ABO             | 9   | rs579459   | 136154168  | C             | 1.072      | 0.3748  | 1                             | yes                          | no                      |
| KIAA1462        | 10  | rs2505083  | 30335122   | C             | 1.06       | 0.4068  | 1                             | yes                          | no                      |
| CXCL12          | 10  | rs1746048  | 44095830   | T             | 0.9525     | 0.6236  | 1                             | yes                          | no                      |
| LIPA            | 10  | rs1412444  | 91002927   | T             | 1.142      | 0.06824 | 1                             | yes                          | yes                     |
| CYP17A1         | 10  | rs12413409 | 104719096  | A             | 0.8629     | 0.2748  | 1                             | yes                          | no                      |
| PDGFD           | 11  | rs974819   | 103660567  | T             | 1.163      | 0.03535 | 1                             | yes                          | yes                     |
| APOA5           | 11  | rs964184   | 116648917  | G             | 0.8446     | 0.088   | 1                             | no                           | no                      |
| SH2B3           | 12  | rs3184504  | 111884608  | T             | 1.101      | 0.1588  | 1                             | yes                          | no                      |
| FLT1            | 13  | rs9319428  | 28973621   | A             | 1.07       | 0.3676  | 1                             | yes                          | no                      |
| COL4A1          | 13  | rs4773144  | 110960712  | G             | 1.109      | 0.1423  | 1                             | yes                          | no                      |
| HHIPL1          | 14  | rs2895811  | 100133942  | C             | 0.9776     | 0.7418  | 1                             | no                           | no                      |
| ADAMTS7         | 15  | rs3825807  | 79089111   | G             | 0.9213     | 0.2311  | 1                             | yes                          | no                      |
| FURIN/FES       | 15  | rs17514846 | 91416550   | A             | 1.181      | 0.01746 | 0.79                          | yes                          | yes                     |
| SMG6            | 17  | rs216172   | 2126504    | C             | 0.9468     | 0.4375  | 1                             | no                           | no                      |
| RASD1           | 17  | rs12936587 | 17543722   | A             | 0.9011     | 0.1307  | 1                             | yes                          | no                      |

|                              |    |           |          |   |        |          |       |     |     |
|------------------------------|----|-----------|----------|---|--------|----------|-------|-----|-----|
| <i>UBE2Z</i>                 | 17 | rs46522   | 46988597 | C | 0.8075 | 0.002056 | 0.093 | yes | yes |
| <i>LDLR</i>                  | 19 | rs1122608 | 11024601 | T | 1.003  | 0.9683   | 1     | no  | no  |
| <i>APOE/APOC1</i>            | 19 | rs2075650 | 45395619 | G | 0.8508 | 0.1316   | 1     | no  | no  |
| Gene<br>desert/ <i>KCNE2</i> | 21 | rs9982601 | 35599128 | A | 1.17   | 0.108    | 1     | yes | no  |

**Supplemental Table III.** *PHACTR1* markers genotyped in 1176 myocardial infarction (MI) cases and 1996 controls selected from the Montreal Heart Institute (MHI) Biobank. The seven rare *PHACTR1* variants were also genotyped in an additional independent subset of the MHI Biobank totaling 870 MI cases and 1494 controls.

| Marker      | Rationale for genotyping                                                                                                                                                                                                                                                                                    |
|-------------|-------------------------------------------------------------------------------------------------------------------------------------------------------------------------------------------------------------------------------------------------------------------------------------------------------------|
| rs12526453  | Canonical <i>PHACTR1</i> MI SNP, tagSNP                                                                                                                                                                                                                                                                     |
| rs2026457   | tagSNP                                                                                                                                                                                                                                                                                                      |
| rs34944538  | tagSNP                                                                                                                                                                                                                                                                                                      |
| rs66867947  | tagSNP                                                                                                                                                                                                                                                                                                      |
| rs59402659  | tagSNP                                                                                                                                                                                                                                                                                                      |
| rs6921974   | tagSNP                                                                                                                                                                                                                                                                                                      |
| rs2026458   | tagSNP                                                                                                                                                                                                                                                                                                      |
| rs9381462   | tagSNP                                                                                                                                                                                                                                                                                                      |
| rs7454157   | tagSNP                                                                                                                                                                                                                                                                                                      |
| rs8180628   | tagSNP                                                                                                                                                                                                                                                                                                      |
| rs9349379   | tagSNP                                                                                                                                                                                                                                                                                                      |
| rs9395224   | tagSNP                                                                                                                                                                                                                                                                                                      |
| rs1412741   | tagSNP                                                                                                                                                                                                                                                                                                      |
| rs1412744   | tagSNP                                                                                                                                                                                                                                                                                                      |
| rs7738252   | top SNP at the <i>PHACTR1</i> locus for association with coronary heart disease in African Americans (Lettre et al., PLoS Genet. 2011)                                                                                                                                                                      |
| rs11757278  | eQTL SNP for <i>PHACTR1</i> transcript level (Pickrell et al., Nature, 2010). This marker was added to the genotyping pool for completeness, although it is not associated with CAD/MI, nor in linkage disequilibrium with rs9349379 in the MHI Biobank ( $r^2=0$ , $D'=0.014$ , physical distance=276 kb). |
| rs36000655  | Frameshift indel, 1000 Genomes Project                                                                                                                                                                                                                                                                      |
| rs61746695  | Rare missense p.Arg94Pro (CGT=>CCT), 1000 Genomes Project                                                                                                                                                                                                                                                   |
| rs17602409  | Rare missense p.Ile247Met (ATC=>ATG), 1000 Genomes Project                                                                                                                                                                                                                                                  |
| ss836901033 | Rare missense p.Ser190Pro (TCT=>CCT), targeted re-sequencing                                                                                                                                                                                                                                                |
| ss836901061 | Rare missense p.Glu196Lys (GAA=>AAA), targeted re-sequencing                                                                                                                                                                                                                                                |
| ss836901074 | Rare, 3' splice site at exon 12, targeted re-sequencing                                                                                                                                                                                                                                                     |
| ss836901090 | Rare, 3'UTR, targeted re-sequencing                                                                                                                                                                                                                                                                         |

**Supplemental Table IV.** Association results between myocardial infarction risk and imputed genotypes for DNA sequence polymorphisms at the *PHACTR1* locus. We performed the analysis using logistic regression and testing an additive genetic model, as implemented in the mach2dat software. We corrected for the following covariates: sex, age, age-squared, hypertension status, type 2 diabetes status and lipid-lowering drug usage.

| Marker          | Chromosome | Position (hg19) | Alleles | Frequency (Allele 1) | Imputation (rsq_hat) | Odds ratio (Allele 1) | P-value |
|-----------------|------------|-----------------|---------|----------------------|----------------------|-----------------------|---------|
| rs1572000       | 6          | 12769487        | G,A     | 0.5998               | 0.614                | 1.183                 | 0.05643 |
| rs10948235      | 6          | 12770823        | T,C     | 0.6602               | 0.6017               | 1.16                  | 0.1094  |
| rs950720        | 6          | 12773990        | C,T     | 0.6606               | 0.6177               | 1.158                 | 0.1089  |
| rs1412749       | 6          | 12774363        | C,G     | 0.5853               | 0.6548               | 1.179                 | 0.05226 |
| 6:12775414:AT_A | 6          | 12775414        | R,D     | 0.6592               | 0.6257               | 1.152                 | 0.1183  |
| rs6941422       | 6          | 12775753        | T,C     | 0.59                 | 0.6573               | 1.177                 | 0.05474 |
| rs9472511       | 6          | 12775922        | C,T     | 0.9288               | 0.6023               | 1.171                 | 0.3457  |
| rs6941624       | 6          | 12775930        | T,C     | 0.659                | 0.6293               | 1.152                 | 0.1181  |
| rs9472512       | 6          | 12776029        | A,G     | 0.9286               | 0.602                | 1.171                 | 0.3467  |
| rs9472513       | 6          | 12776067        | C,G     | 0.9288               | 0.6034               | 1.171                 | 0.346   |
| rs9472514       | 6          | 12776212        | G,A     | 0.9288               | 0.6036               | 1.171                 | 0.3462  |
| rs7757205       | 6          | 12777449        | G,A     | 0.5901               | 0.6624               | 1.175                 | 0.05555 |
| rs7758513       | 6          | 12777571        | C,T     | 0.6609               | 0.6342               | 1.145                 | 0.1338  |
| rs9472519       | 6          | 12777723        | A,G     | 0.9299               | 0.606                | 1.181                 | 0.321   |
| rs9463105       | 6          | 12777790        | C,A     | 0.929                | 0.6237               | 1.17                  | 0.3401  |
| rs9472520       | 6          | 12777828        | A,G     | 0.9289               | 0.6243               | 1.17                  | 0.3399  |
| rs11758650      | 6          | 12778109        | C,A     | 0.6578               | 0.6488               | 1.144                 | 0.1298  |
| rs11753864      | 6          | 12778218        | G,A     | 0.6584               | 0.6494               | 1.146                 | 0.1252  |
| rs9463106       | 6          | 12778864        | G,A     | 0.5866               | 0.6856               | 1.17                  | 0.05799 |
| rs6922969       | 6          | 12780032        | T,C     | 0.5864               | 0.6895               | 1.169                 | 0.05808 |
| rs6938417       | 6          | 12780185        | G,A     | 0.5863               | 0.6909               | 1.169                 | 0.05804 |
| rs1572002       | 6          | 12780990        | G,A     | 0.5863               | 0.6933               | 1.169                 | 0.05803 |
| rs9472528       | 6          | 12781353        | A,G     | 0.9288               | 0.6362               | 1.168                 | 0.3399  |
| rs9381391       | 6          | 12781416        | C,T     | 0.5696               | 0.7016               | 1.165                 | 0.06127 |
| rs12528721      | 6          | 12782518        | C,G     | 0.9287               | 0.6407               | 1.166                 | 0.3414  |
| rs9463110       | 6          | 12782602        | T,G     | 0.5854               | 0.7014               | 1.168                 | 0.05819 |
| rs12525210      | 6          | 12782675        | G,A     | 0.9287               | 0.6412               | 1.166                 | 0.3416  |
| rs7760140       | 6          | 12782968        | G,T     | 0.6566               | 0.6682               | 1.142                 | 0.1301  |
| rs9296464       | 6          | 12784293        | T,C     | 0.6565               | 0.6717               | 1.141                 | 0.1302  |
| rs9296465       | 6          | 12784464        | A,G     | 0.5859               | 0.7068               | 1.168                 | 0.05698 |
| rs12524974      | 6          | 12784785        | A,G     | 0.6564               | 0.6745               | 1.141                 | 0.1304  |
| rs55764622      | 6          | 12784847        | T,A     | 0.9283               | 0.648                | 1.165                 | 0.3411  |
| rs2327617       | 6          | 12785023        | C,T     | 0.6664               | 0.6357               | 1.147                 | 0.1294  |
| 6:12785347:AC_A | 6          | 12785347        | R,D     | 0.6564               | 0.6773               | 1.141                 | 0.1304  |
| rs10948244      | 6          | 12786085        | T,C     | 0.6845               | 0.6734               | 1.155                 | 0.1064  |
| rs9472549       | 6          | 12786237        | C,A     | 0.9284               | 0.6538               | 1.164                 | 0.3409  |
| rs9472551       | 6          | 12786272        | C,A     | 0.5843               | 0.723                | 1.166                 | 0.05701 |
| rs10948247      | 6          | 12786511        | C,A     | 0.6559               | 0.6882               | 1.14                  | 0.1277  |
| rs1412751       | 6          | 12787247        | G,A     | 0.5842               | 0.7258               | 1.165                 | 0.0571  |
| rs944766        | 6          | 12787449        | C,T     | 0.584                | 0.7289               | 1.165                 | 0.05709 |
| rs883947        | 6          | 12787714        | C,T     | 0.6556               | 0.6944               | 1.14                  | 0.1277  |
| rs944767        | 6          | 12788029        | C,G     | 0.7411               | 0.7236               | 1.097                 | 0.3106  |
| rs2015761       | 6          | 12788243        | A,C     | 0.9283               | 0.6627               | 1.163                 | 0.3407  |
| rs2015764       | 6          | 12788283        | G,A     | 0.5841               | 0.7332               | 1.164                 | 0.05704 |
| 6:12788487:TA_T | 6          | 12788487        | R,D     | 0.5835               | 0.7368               | 1.162                 | 0.05956 |
| rs1412752       | 6          | 12788776        | A,T     | 0.6549               | 0.6991               | 1.139                 | 0.1273  |

|                 |   |          |     |        |        |       |           |
|-----------------|---|----------|-----|--------|--------|-------|-----------|
| rs6458460       | 6 | 12789038 | C,A | 0.5816 | 0.7376 | 1.163 | 0.05749   |
| rs6458461       | 6 | 12789191 | C,T | 0.5836 | 0.7388 | 1.164 | 0.05704   |
| rs73722844      | 6 | 12789322 | T,C | 0.9334 | 0.6153 | 1.182 | 0.3254    |
| rs73722845      | 6 | 12789323 | G,A | 0.9334 | 0.6156 | 1.182 | 0.3257    |
| rs9472558       | 6 | 12789655 | C,T | 0.6552 | 0.7045 | 1.138 | 0.128     |
| rs2095123       | 6 | 12790079 | A,G | 0.6505 | 0.6965 | 1.141 | 0.1221    |
| rs2327619       | 6 | 12790353 | G,A | 0.6556 | 0.7068 | 1.14  | 0.1231    |
| rs7747656       | 6 | 12790872 | A,G | 0.6565 | 0.707  | 1.143 | 0.1157    |
| rs1412753       | 6 | 12791207 | G,C | 0.6555 | 0.7109 | 1.14  | 0.123     |
| rs4714866       | 6 | 12791802 | G,A | 0.583  | 0.7499 | 1.162 | 0.05704   |
| rs4714868       | 6 | 12791878 | T,C | 0.583  | 0.7502 | 1.162 | 0.05702   |
| rs9463114       | 6 | 12794542 | G,A | 0.9292 | 0.6657 | 1.164 | 0.3388    |
| rs73722849      | 6 | 12795009 | G,A | 0.9307 | 0.6812 | 1.154 | 0.3666    |
| rs10807323      | 6 | 12795031 | G,A | 0.5829 | 0.6792 | 0.743 | 0.0004155 |
| rs6924150       | 6 | 12795621 | C,T | 0.5826 | 0.7586 | 1.161 | 0.05696   |
| 6:12796108:AT_A | 6 | 12796108 | R,D | 0.5813 | 0.7567 | 1.161 | 0.05839   |
| rs9463117       | 6 | 12796984 | A,G | 0.928  | 0.6902 | 1.159 | 0.3409    |
| rs4714870       | 6 | 12797055 | T,G | 0.654  | 0.7352 | 1.135 | 0.1279    |
| rs9463119       | 6 | 12797496 | A,G | 0.9278 | 0.698  | 1.158 | 0.3399    |
| rs9472566       | 6 | 12797940 | C,T | 0.927  | 0.6928 | 1.154 | 0.353     |
| rs7757835       | 6 | 12798443 | A,G | 0.6543 | 0.7411 | 1.136 | 0.1232    |
| rs7757858       | 6 | 12798477 | A,C | 0.5814 | 0.7805 | 1.159 | 0.05633   |
| rs9472583       | 6 | 12799417 | C,A | 0.6538 | 0.759  | 1.132 | 0.1301    |
| rs17617207      | 6 | 12800332 | G,A | 0.5792 | 0.7994 | 1.155 | 0.05969   |
| rs16873383      | 6 | 12800443 | A,T | 0.6523 | 0.758  | 1.131 | 0.1334    |
| rs12530186      | 6 | 12800690 | T,C | 0.6537 | 0.7635 | 1.132 | 0.1305    |
| rs2876298       | 6 | 12800727 | C,A | 0.9135 | 0.6167 | 1.151 | 0.3524    |
| rs12523719      | 6 | 12800824 | T,G | 0.6537 | 0.7646 | 1.132 | 0.1301    |
| rs9472587       | 6 | 12800874 | A,T | 0.6536 | 0.766  | 1.131 | 0.1302    |
| rs9472590       | 6 | 12801104 | C,G | 0.6534 | 0.7669 | 1.131 | 0.1324    |
| 6:12801131:G_GA | 6 | 12801131 | R,I | 0.6738 | 0.6451 | 1.14  | 0.1473    |
| rs6917492       | 6 | 12801487 | C,T | 0.6664 | 0.7252 | 1.141 | 0.1182    |
| rs6917493       | 6 | 12801488 | C,G | 0.6673 | 0.722  | 1.142 | 0.1186    |
| rs6916334       | 6 | 12801594 | G,T | 0.653  | 0.7717 | 1.131 | 0.1292    |
| rs62389219      | 6 | 12801782 | C,T | 0.9457 | 0.6243 | 1.284 | 0.1828    |
| rs9381401       | 6 | 12801967 | A,C | 0.5824 | 0.7247 | 0.75  | 0.0004147 |
| rs28451666      | 6 | 12802374 | G,A | 0.6529 | 0.7735 | 1.131 | 0.129     |
| rs13214313      | 6 | 12802428 | G,A | 0.6528 | 0.7754 | 1.131 | 0.1291    |
| rs13203774      | 6 | 12802502 | T,C | 0.654  | 0.7728 | 1.132 | 0.1277    |
| rs13203883      | 6 | 12802560 | T,C | 0.6546 | 0.7696 | 1.131 | 0.1297    |
| rs9463134       | 6 | 12802815 | G,C | 0.6536 | 0.7746 | 1.132 | 0.1271    |
| rs9472594       | 6 | 12803223 | C,A | 0.6527 | 0.7802 | 1.131 | 0.1289    |
| rs12215445      | 6 | 12803314 | G,A | 0.8574 | 0.6003 | 1.329 | 0.02295   |
| rs6919327       | 6 | 12803410 | A,G | 0.5781 | 0.82   | 1.154 | 0.05766   |
| rs9463136       | 6 | 12803416 | T,C | 0.6527 | 0.782  | 1.13  | 0.1289    |
| rs9463137       | 6 | 12803582 | G,T | 0.6526 | 0.7828 | 1.13  | 0.1288    |
| rs9472595       | 6 | 12803718 | C,T | 0.6525 | 0.7839 | 1.13  | 0.1291    |
| rs9463138       | 6 | 12803792 | A,G | 0.6529 | 0.7837 | 1.13  | 0.1296    |
| rs1953089       | 6 | 12804619 | C,T | 0.6526 | 0.7895 | 1.13  | 0.1287    |
| rs9463140       | 6 | 12804870 | A,G | 0.9265 | 0.7341 | 1.153 | 0.3398    |
| rs13196135      | 6 | 12804875 | G,A | 0.6794 | 0.7638 | 1.141 | 0.1124    |
| rs6935309       | 6 | 12804882 | T,C | 0.6548 | 0.782  | 1.13  | 0.131     |
| rs6458473       | 6 | 12804934 | G,C | 0.6525 | 0.7917 | 1.13  | 0.1284    |
| rs6930873       | 6 | 12805039 | A,T | 0.6525 | 0.7921 | 1.13  | 0.1286    |
| rs6909834       | 6 | 12805582 | C,T | 0.6524 | 0.7953 | 1.129 | 0.1288    |
| rs6913075       | 6 | 12805821 | G,C | 0.6526 | 0.7968 | 1.13  | 0.1266    |
| rs6914513       | 6 | 12805843 | C,T | 0.6016 | 0.7552 | 1.159 | 0.06245   |
| rs1412738       | 6 | 12805995 | A,G | 0.653  | 0.7961 | 1.131 | 0.1229    |
| rs7762417       | 6 | 12807829 | C,T | 0.6513 | 0.8028 | 1.131 | 0.1225    |



|                 |   |          |     |        |        |       |           |
|-----------------|---|----------|-----|--------|--------|-------|-----------|
| rs7762547       | 6 | 12807877 | C,A | 0.5783 | 0.8491 | 1.151 | 0.05776   |
| rs10498681      | 6 | 12808284 | C,T | 0.9278 | 0.7772 | 1.138 | 0.3752    |
| rs12525116      | 6 | 12809740 | T,C | 0.9282 | 0.788  | 1.139 | 0.3717    |
| rs7760286       | 6 | 12810937 | A,G | 0.6527 | 0.8376 | 1.128 | 0.1233    |
| rs56270763      | 6 | 12810945 | C,T | 0.928  | 0.7951 | 1.139 | 0.3682    |
| rs1011188       | 6 | 12812948 | A,G | 0.9284 | 0.8098 | 1.138 | 0.3672    |
| rs62389220      | 6 | 12815105 | C,G | 0.942  | 0.7286 | 1.22  | 0.2386    |
| rs62389221      | 6 | 12815161 | A,G | 0.9385 | 0.7641 | 1.202 | 0.2499    |
| rs2151221       | 6 | 12816578 | C,G | 0.9281 | 0.824  | 1.136 | 0.3676    |
| rs7764490       | 6 | 12817237 | A,G | 0.5746 | 0.9381 | 1.139 | 0.06417   |
| rs1412740       | 6 | 12817590 | A,G | 0.5756 | 0.9402 | 1.138 | 0.06639   |
| rs13215300      | 6 | 12817608 | T,C | 0.9384 | 0.7818 | 1.2   | 0.2502    |
| rs1412741       | 6 | 12817667 | A,G | 0.6365 | 0.9969 | 1.097 | 0.1845    |
| rs13215271      | 6 | 12817748 | A,G | 0.9384 | 0.7828 | 1.199 | 0.2506    |
| rs4711841       | 6 | 12818142 | G,C | 0.6366 | 0.9958 | 1.097 | 0.1842    |
| rs35784087      | 6 | 12818204 | T,C | 0.9384 | 0.7842 | 1.199 | 0.25      |
| rs1332840       | 6 | 12818865 | G,C | 0.5736 | 0.9445 | 1.139 | 0.06469   |
| rs62389223      | 6 | 12819405 | C,T | 0.9394 | 0.7727 | 1.199 | 0.2567    |
| rs7776079       | 6 | 12819572 | A,G | 0.5678 | 0.9502 | 1.136 | 0.06935   |
| rs114389430     | 6 | 12820655 | G,A | 0.9799 | 0.734  | 0.72  | 0.23      |
| rs9472672       | 6 | 12821258 | A,G | 0.8381 | 0.8709 | 1.18  | 0.09176   |
| rs6915402       | 6 | 12821491 | A,T | 0.5655 | 0.9452 | 1.168 | 0.02776   |
| rs10434854      | 6 | 12822566 | C,T | 0.8478 | 0.8734 | 1.178 | 0.1046    |
| rs10434855      | 6 | 12822711 | C,A | 0.9143 | 0.7865 | 1.148 | 0.3022    |
| rs7768030       | 6 | 12822973 | A,C | 0.9134 | 0.7923 | 1.152 | 0.2876    |
| rs9381417       | 6 | 12823820 | G,A | 0.9134 | 0.7959 | 1.151 | 0.2883    |
| rs58666803      | 6 | 12824263 | T,C | 0.9193 | 0.737  | 1.169 | 0.2713    |
| rs60954427      | 6 | 12824264 | G,A | 0.9272 | 0.7653 | 1.194 | 0.2256    |
| rs56408440      | 6 | 12824700 | C,T | 0.848  | 0.8819 | 1.175 | 0.1072    |
| rs57387500      | 6 | 12824892 | A,G | 0.8477 | 0.8835 | 1.175 | 0.1076    |
| rs77664195      | 6 | 12824994 | A,G | 0.9185 | 0.8296 | 1.163 | 0.2592    |
| rs4142300       | 6 | 12825772 | A,G | 0.8478 | 0.8863 | 1.174 | 0.1081    |
| rs2026457       | 6 | 12825805 | G,A | 0.5685 | 0.9999 | 1.167 | 0.0249    |
| rs2026458       | 6 | 12825874 | C,T | 0.5692 | 0.9992 | 0.788 | 0.0005787 |
| rs9349344       | 6 | 12826479 | T,C | 0.568  | 0.9971 | 1.167 | 0.0249    |
| rs35278288      | 6 | 12826700 | A,G | 0.9138 | 0.8043 | 1.15  | 0.2904    |
| rs13215145      | 6 | 12827170 | G,A | 0.9344 | 0.8618 | 1.189 | 0.2376    |
| rs9349346       | 6 | 12827334 | A,T | 0.5628 | 0.9716 | 1.172 | 0.02223   |
| 6:12828114:AG_A | 6 | 12828114 | R,D | 0.8484 | 0.8848 | 1.175 | 0.1075    |
| rs17679286      | 6 | 12828434 | A,G | 0.933  | 0.8109 | 1.132 | 0.4053    |
| 6:12828992:T_TA | 6 | 12828992 | R,I | 0.8439 | 0.7393 | 1.203 | 0.08705   |
| rs9381427       | 6 | 12830144 | T,C | 0.8473 | 0.8763 | 1.171 | 0.1165    |
| rs6915585       | 6 | 12831273 | G,A | 0.9143 | 0.8051 | 1.151 | 0.2886    |
| rs62389228      | 6 | 12832840 | A,G | 0.9307 | 0.7941 | 1.092 | 0.5534    |
| rs12528956      | 6 | 12833077 | T,C | 0.736  | 0.933  | 1.12  | 0.1579    |
| rs7741088       | 6 | 12834122 | C,T | 0.9377 | 0.8302 | 1.2   | 0.2316    |
| rs1571996       | 6 | 12834714 | T,C | 0.9138 | 0.8003 | 1.151 | 0.2874    |
| 6:12835139:GT_G | 6 | 12835139 | R,D | 0.5715 | 0.9518 | 0.782 | 0.0005227 |
| 6:12835490:G_GA | 6 | 12835490 | R,I | 0.9208 | 0.8243 | 1.171 | 0.2454    |
| rs6458493       | 6 | 12835673 | G,A | 0.8469 | 0.8829 | 1.174 | 0.1085    |
| rs12528247      | 6 | 12835880 | C,A | 0.9282 | 0.8647 | 1.132 | 0.3721    |
| rs6458494       | 6 | 12836186 | T,C | 0.847  | 0.8825 | 1.175 | 0.1063    |
| rs28734939      | 6 | 12837663 | T,A | 0.867  | 0.7948 | 1.198 | 0.1079    |
| rs9395161       | 6 | 12838334 | C,T | 0.848  | 0.8815 | 1.177 | 0.104     |
| rs9381435       | 6 | 12838426 | C,T | 0.8477 | 0.883  | 1.176 | 0.1051    |
| rs9395162       | 6 | 12838532 | T,A | 0.848  | 0.8816 | 1.177 | 0.1043    |
| rs9463187       | 6 | 12839176 | A,C | 0.723  | 0.9422 | 1.118 | 0.1555    |
| rs1412742       | 6 | 12840104 | G,A | 0.8508 | 0.8887 | 1.175 | 0.11      |
| rs1412743       | 6 | 12840112 | C,G | 0.851  | 0.8883 | 1.174 | 0.1118    |

|                 |   |          |     |        |        |       |           |
|-----------------|---|----------|-----|--------|--------|-------|-----------|
| rs16873431      | 6 | 12840508 | T,C | 0.8554 | 0.867  | 1.18  | 0.1089    |
| 6:12840537:G_GA | 6 | 12840537 | R,I | 0.851  | 0.8886 | 1.174 | 0.1119    |
| rs13192509      | 6 | 12840877 | C,G | 0.8512 | 0.8873 | 1.175 | 0.1109    |
| rs16873436      | 6 | 12841033 | G,C | 0.851  | 0.8887 | 1.174 | 0.1121    |
| rs1537334       | 6 | 12841241 | C,G | 0.8517 | 0.8931 | 1.171 | 0.1167    |
| rs3945322       | 6 | 12841306 | G,A | 0.8517 | 0.8916 | 1.168 | 0.1239    |
| rs9357503       | 6 | 12841985 | T,A | 0.8519 | 0.8936 | 1.172 | 0.1151    |
| rs9349350       | 6 | 12842285 | A,G | 0.8522 | 0.8922 | 1.173 | 0.1143    |
| rs5017386       | 6 | 12842373 | G,T | 0.8519 | 0.8938 | 1.172 | 0.1154    |
| rs4711842       | 6 | 12842531 | G,A | 0.8522 | 0.8925 | 1.173 | 0.1144    |
| rs1537335       | 6 | 12842563 | G,A | 0.8519 | 0.8938 | 1.172 | 0.1155    |
| rs1537336       | 6 | 12842883 | C,A | 0.853  | 0.8778 | 1.176 | 0.1116    |
| rs1537337       | 6 | 12843006 | G,A | 0.8522 | 0.8927 | 1.173 | 0.1143    |
| rs1537338       | 6 | 12843203 | A,G | 0.8525 | 0.8865 | 1.176 | 0.1094    |
| rs9369605       | 6 | 12843219 | A,C | 0.852  | 0.8914 | 1.174 | 0.1119    |
| rs16873447      | 6 | 12844001 | A,T | 0.852  | 0.8937 | 1.173 | 0.1145    |
| rs16873449      | 6 | 12844141 | A,T | 0.852  | 0.8938 | 1.172 | 0.1147    |
| rs13192344      | 6 | 12844264 | C,A | 0.852  | 0.8938 | 1.172 | 0.1147    |
| rs9381436       | 6 | 12844405 | C,T | 0.852  | 0.894  | 1.172 | 0.1147    |
| rs9367239       | 6 | 12844465 | A,G | 0.852  | 0.8941 | 1.172 | 0.1147    |
| rs2184027       | 6 | 12844712 | A,G | 0.852  | 0.8952 | 1.172 | 0.1157    |
| rs13194950      | 6 | 12844775 | G,A | 0.9373 | 0.9077 | 1.166 | 0.2897    |
| rs4714913       | 6 | 12845085 | C,T | 0.8517 | 0.8962 | 1.171 | 0.1169    |
| rs4711845       | 6 | 12845156 | A,G | 0.852  | 0.8953 | 1.172 | 0.116     |
| rs4711848       | 6 | 12845240 | C,A | 0.8511 | 0.895  | 1.172 | 0.1151    |
| rs9349352       | 6 | 12846517 | C,T | 0.8518 | 0.8979 | 1.172 | 0.1139    |
| rs9369607       | 6 | 12846847 | T,A | 0.9192 | 0.8452 | 1.172 | 0.2321    |
| rs2065490       | 6 | 12847494 | T,C | 0.8522 | 0.8975 | 1.173 | 0.1129    |
| rs2065491       | 6 | 12847595 | A,T | 0.8522 | 0.8976 | 1.173 | 0.113     |
| rs9367240       | 6 | 12848685 | C,T | 0.8522 | 0.8977 | 1.173 | 0.1138    |
| rs9296486       | 6 | 12848969 | T,G | 0.8522 | 0.8982 | 1.173 | 0.1136    |
| rs9296487       | 6 | 12849031 | T,C | 0.5666 | 0.9553 | 1.19  | 0.01329   |
| rs9296488       | 6 | 12849304 | A,G | 0.8519 | 0.8998 | 1.172 | 0.1151    |
| rs62389889      | 6 | 12849622 | G,T | 0.9372 | 0.9123 | 1.164 | 0.2946    |
| rs9381439       | 6 | 12849678 | G,A | 0.8522 | 0.8987 | 1.173 | 0.1138    |
| rs12215208      | 6 | 12850294 | C,T | 0.5778 | 0.905  | 0.769 | 0.0003128 |
| rs9395172       | 6 | 12850534 | G,A | 0.571  | 0.9395 | 1.185 | 0.01699   |
| rs36043593      | 6 | 12850604 | C,T | 0.9372 | 0.9132 | 1.164 | 0.295     |
| rs6900427       | 6 | 12851560 | G,A | 0.933  | 0.9558 | 1.134 | 0.361     |
| rs13191496      | 6 | 12851625 | G,A | 0.9369 | 0.916  | 1.162 | 0.2994    |
| rs6917097       | 6 | 12851768 | T,C | 0.5709 | 0.9395 | 1.186 | 0.01645   |
| rs4714930       | 6 | 12852478 | T,G | 0.5737 | 0.9383 | 1.189 | 0.01491   |
| rs59402659      | 6 | 12853162 | A,G | 0.7247 | 0.9999 | 1.13  | 0.1093    |
| rs9369612       | 6 | 12853192 | T,C | 0.916  | 0.8254 | 1.158 | 0.2664    |
| rs34448141      | 6 | 12853265 | C,T | 0.9714 | 0.7876 | 1.565 | 0.04765   |
| rs62389892      | 6 | 12853979 | A,G | 0.9369 | 0.9179 | 1.16  | 0.3024    |
| rs6914233       | 6 | 12854443 | T,C | 0.933  | 0.9587 | 1.132 | 0.3666    |
| rs62389893      | 6 | 12854881 | G,T | 0.9406 | 0.8755 | 1.175 | 0.2867    |
| rs62389894      | 6 | 12854962 | A,T | 0.9369 | 0.9187 | 1.16  | 0.304     |
| rs35657920      | 6 | 12855243 | A,C | 0.8492 | 0.886  | 1.164 | 0.1317    |
| rs7454135       | 6 | 12855542 | T,G | 0.5709 | 0.9459 | 1.193 | 0.01256   |
| rs75506162      | 6 | 12855702 | C,T | 0.9165 | 0.8259 | 1.165 | 0.2484    |
| rs62389896      | 6 | 12855854 | A,G | 0.93   | 0.8426 | 1.093 | 0.5377    |
| rs13205779      | 6 | 12856004 | A,G | 0.933  | 0.9604 | 1.131 | 0.37      |
| 6:12856483:C_CT | 6 | 12856483 | R,I | 0.937  | 0.7109 | 1.218 | 0.2279    |
| rs9395185       | 6 | 12856827 | A,G | 0.8492 | 0.8853 | 1.164 | 0.132     |
| rs35395772      | 6 | 12857393 | G,A | 0.9372 | 0.9182 | 1.161 | 0.3017    |
| rs4714931       | 6 | 12857408 | A,G | 0.9165 | 0.8255 | 1.166 | 0.2473    |
| 6:12857625:CG_C | 6 | 12857625 | R,D | 0.9407 | 0.8763 | 1.175 | 0.2886    |

|             |   |          |     |        |        |       |           |
|-------------|---|----------|-----|--------|--------|-------|-----------|
| rs7748950   | 6 | 12858223 | T,C | 0.7218 | 0.9889 | 1.126 | 0.1208    |
| rs13198167  | 6 | 12858242 | G,A | 0.9371 | 0.9185 | 1.161 | 0.3021    |
| rs72835698  | 6 | 12858776 | G,A | 0.9296 | 0.8436 | 1.089 | 0.5506    |
| rs35621699  | 6 | 12858904 | T,C | 0.9371 | 0.9191 | 1.16  | 0.3038    |
| rs6458503   | 6 | 12859556 | C,T | 0.7219 | 0.989  | 1.126 | 0.121     |
| rs55879442  | 6 | 12859873 | T,C | 0.9284 | 0.8903 | 1.141 | 0.3347    |
| rs9296494   | 6 | 12859886 | A,G | 0.6549 | 0.9932 | 1.149 | 0.05422   |
| rs9395190   | 6 | 12860080 | T,C | 0.6549 | 0.9933 | 1.149 | 0.05428   |
| rs144273252 | 6 | 12860491 | T,C | 0.9845 | 0.6917 | 0.751 | 0.3693    |
| rs6924353   | 6 | 12860700 | C,T | 0.9531 | 0.7441 | 1.342 | 0.1082    |
| rs6912532   | 6 | 12860762 | T,C | 0.9332 | 0.9656 | 1.129 | 0.3768    |
| rs6927781   | 6 | 12860987 | G,C | 0.937  | 0.9227 | 1.157 | 0.3095    |
| rs62389900  | 6 | 12862200 | G,T | 0.937  | 0.9245 | 1.156 | 0.3125    |
| rs16873462  | 6 | 12862244 | G,A | 0.937  | 0.9246 | 1.156 | 0.3128    |
| rs17617491  | 6 | 12862562 | C,T | 0.9263 | 0.8834 | 1.159 | 0.2776    |
| rs7770745   | 6 | 12862978 | A,T | 0.7247 | 0.9795 | 1.126 | 0.1254    |
| rs17679417  | 6 | 12863108 | A,T | 0.7298 | 0.9747 | 1.145 | 0.08181   |
| rs34348949  | 6 | 12863250 | A,G | 0.937  | 0.9254 | 1.156 | 0.3136    |
| rs9381451   | 6 | 12863621 | T,C | 0.9157 | 0.8257 | 1.178 | 0.2155    |
| rs7771962   | 6 | 12863738 | T,C | 0.7249 | 0.9959 | 1.13  | 0.1092    |
| rs9472752   | 6 | 12864134 | T,C | 0.5709 | 0.927  | 1.198 | 0.01142   |
| rs6914467   | 6 | 12864309 | G,A | 0.9369 | 0.9265 | 1.155 | 0.3152    |
| rs9381455   | 6 | 12864898 | C,T | 0.7052 | 0.9144 | 1.137 | 0.1006    |
| rs9381456   | 6 | 12865148 | A,G | 0.6555 | 0.9996 | 1.147 | 0.05717   |
| rs6901070   | 6 | 12865243 | G,A | 0.6545 | 0.9935 | 1.146 | 0.05815   |
| rs6921974   | 6 | 12865376 | T,C | 0.6555 | 0.9997 | 1.147 | 0.05724   |
| rs60844130  | 6 | 12865503 | C,G | 0.8591 | 0.7718 | 1.177 | 0.1437    |
| rs9296495   | 6 | 12865649 | G,A | 0.5706 | 0.9438 | 1.196 | 0.0114    |
| rs35227817  | 6 | 12866528 | G,A | 0.9403 | 0.8824 | 1.17  | 0.2983    |
| rs55803153  | 6 | 12866927 | G,A | 0.9362 | 0.9115 | 1.142 | 0.3569    |
| rs35954478  | 6 | 12867215 | A,G | 0.9376 | 0.8836 | 1.158 | 0.3213    |
| rs1412744   | 6 | 12867696 | A,G | 0.7261 | 0.9969 | 1.177 | 0.03282   |
| rs113606396 | 6 | 12868263 | G,A | 0.841  | 0.6887 | 1.167 | 0.1681    |
| rs55637633  | 6 | 12868320 | C,A | 0.9397 | 0.8752 | 1.176 | 0.2822    |
| rs62389950  | 6 | 12868726 | C,T | 0.8539 | 0.8807 | 1.076 | 0.474     |
| rs1360579   | 6 | 12871736 | G,A | 0.713  | 0.9603 | 1.154 | 0.06176   |
| rs9472777   | 6 | 12872092 | G,A | 0.7109 | 0.9699 | 1.153 | 0.06135   |
| rs4714946   | 6 | 12872220 | G,A | 0.723  | 0.9602 | 1.169 | 0.04348   |
| rs4711856   | 6 | 12872477 | G,A | 0.943  | 0.9196 | 1.16  | 0.327     |
| rs78881531  | 6 | 12872817 | C,T | 0.944  | 0.9308 | 1.158 | 0.3329    |
| rs9381462   | 6 | 12873775 | G,A | 0.4902 | 0.9993 | 1.195 | 0.008286  |
| rs1571997   | 6 | 12874309 | A,G | 0.4822 | 0.9693 | 1.204 | 0.006721  |
| rs66867947  | 6 | 12874672 | T,G | 0.7118 | 0.9986 | 1.136 | 0.08712   |
| rs1332841   | 6 | 12875054 | G,T | 0.7097 | 0.9838 | 1.139 | 0.08342   |
| rs9472786   | 6 | 12877597 | G,T | 0.7152 | 0.9622 | 1.156 | 0.05828   |
| rs9472790   | 6 | 12879101 | T,A | 0.4851 | 0.9522 | 1.213 | 0.005116  |
| rs1332842   | 6 | 12879851 | C,T | 0.9444 | 0.9376 | 1.157 | 0.3368    |
| rs17679501  | 6 | 12879996 | T,A | 0.7128 | 0.9614 | 1.158 | 0.05392   |
| rs4711857   | 6 | 12880109 | C,T | 0.7133 | 0.9629 | 1.158 | 0.05395   |
| rs4711858   | 6 | 12880131 | T,C | 0.7216 | 0.9637 | 1.163 | 0.05022   |
| rs8180628   | 6 | 12881163 | G,A | 0.6624 | 0.9947 | 1.2   | 0.01061   |
| rs1537340   | 6 | 12881855 | G,A | 0.6926 | 0.9181 | 1.321 | 0.000321  |
| rs17617584  | 6 | 12882064 | A,G | 0.9411 | 0.8632 | 1.13  | 0.4274    |
| rs59802022  | 6 | 12882105 | C,A | 0.9408 | 0.8559 | 1.128 | 0.435     |
| rs55908560  | 6 | 12882732 | C,T | 0.9419 | 0.8705 | 1.128 | 0.4362    |
| rs13208248  | 6 | 12883524 | C,A | 0.6741 | 0.9187 | 1.316 | 0.0002878 |
| rs9349371   | 6 | 12886313 | C,T | 0.9181 | 0.7322 | 1.089 | 0.5557    |
| rs9367253   | 6 | 12888047 | A,T | 0.8871 | 0.6661 | 1.06  | 0.6528    |
| rs9357513   | 6 | 12888105 | A,G | 0.9226 | 0.7819 | 1.096 | 0.521     |

|                 |   |          |     |        |        |       |           |
|-----------------|---|----------|-----|--------|--------|-------|-----------|
| rs146401688     | 6 | 12888498 | C,T | 0.985  | 0.7133 | 1.184 | 0.5946    |
| rs71562459      | 6 | 12888602 | G,C | 0.6917 | 0.9916 | 1.304 | 0.0003331 |
| rs1332844       | 6 | 12889004 | T,C | 0.6158 | 0.9375 | 1.315 | 0.0001361 |
| rs34944538      | 6 | 12889145 | A,G | 0.6915 | 0.9978 | 1.302 | 0.0003432 |
| 6:12889973:CT_C | 6 | 12889973 | R,D | 0.9486 | 0.892  | 1.125 | 0.4693    |
| rs9349372       | 6 | 12890676 | T,C | 0.9202 | 0.751  | 1.107 | 0.4805    |
| rs35355695      | 6 | 12891103 | G,T | 0.6959 | 0.9796 | 1.299 | 0.0004641 |
| rs7750679       | 6 | 12891301 | C,T | 0.6171 | 0.9333 | 1.312 | 0.0001619 |
| rs6902050       | 6 | 12892236 | A,G | 0.9202 | 0.7482 | 1.105 | 0.4862    |
| rs1332845       | 6 | 12892456 | A,G | 0.699  | 0.9673 | 1.306 | 0.0004021 |
| rs6925904       | 6 | 12892486 | G,A | 0.6171 | 0.9335 | 1.31  | 0.0001719 |
| rs1332846       | 6 | 12892523 | T,A | 0.6976 | 0.9718 | 1.305 | 0.0003968 |
| rs1332847       | 6 | 12892754 | C,T | 0.6977 | 0.9716 | 1.305 | 0.0003985 |
| rs2876300       | 6 | 12894103 | A,G | 0.6965 | 0.9651 | 1.308 | 0.0003746 |
| rs2095122       | 6 | 12894858 | T,C | 0.9212 | 0.7539 | 1.103 | 0.4972    |
| rs9296512       | 6 | 12894904 | C,G | 0.6085 | 0.9049 | 1.324 | 0.0001153 |
| rs2104908       | 6 | 12895056 | G,A | 0.9183 | 0.7318 | 1.109 | 0.4714    |
| rs62389954      | 6 | 12896740 | G,A | 0.6964 | 0.9617 | 1.308 | 0.0003766 |
| rs4714951       | 6 | 12897307 | C,T | 0.6978 | 0.967  | 1.306 | 0.0004011 |
| rs73362169      | 6 | 12897549 | C,T | 0.9425 | 0.8474 | 1.129 | 0.441     |
| rs1831705       | 6 | 12898162 | G,A | 0.95   | 0.8975 | 1.125 | 0.4713    |
| rs1831706       | 6 | 12898178 | T,C | 0.9435 | 0.8051 | 1.135 | 0.4367    |
| rs13219256      | 6 | 12898292 | C,T | 0.698  | 0.9661 | 1.306 | 0.0004085 |
| rs9395214       | 6 | 12898884 | G,C | 0.5983 | 0.936  | 1.297 | 0.0002556 |
| rs7751826       | 6 | 12900977 | T,C | 0.6092 | 0.9477 | 1.298 | 0.000236  |
| rs9369640       | 6 | 12901441 | A,C | 0.6095 | 0.9501 | 1.298 | 0.0002403 |
| rs62389955      | 6 | 12902248 | A,G | 0.6432 | 0.9715 | 1.3   | 0.000247  |
| rs6911226       | 6 | 12902290 | G,A | 0.6093 | 0.9542 | 1.297 | 0.000243  |
| rs6915983       | 6 | 12902441 | G,T | 0.6086 | 0.9431 | 1.298 | 0.0002474 |
| rs4714955       | 6 | 12903435 | C,T | 0.6449 | 0.9719 | 1.299 | 0.0002641 |
| rs1537341       | 6 | 12903900 | T,C | 0.9684 | 0.6472 | 1.043 | 0.8598    |
| rs9349379       | 6 | 12903957 | A,G | 0.6257 | 0.9827 | 0.727 | 5.88E-06  |
| rs7759918       | 6 | 12904536 | T,A | 0.9689 | 0.6565 | 1.039 | 0.8709    |
| rs9472888       | 6 | 12904903 | A,G | 0.9725 | 0.732  | 1.048 | 0.844     |
| rs6912234       | 6 | 12906346 | G,C | 0.9726 | 0.7374 | 1.05  | 0.8388    |
| rs2876301       | 6 | 12907411 | T,C | 0.5815 | 0.8658 | 1.305 | 0.0002876 |
| rs2876302       | 6 | 12907412 | A,G | 0.5863 | 0.8826 | 1.303 | 0.0002759 |
| rs2327620       | 6 | 12907591 | G,A | 0.6082 | 0.9696 | 1.289 | 0.0002904 |
| rs7760016       | 6 | 12908077 | A,G | 0.6012 | 0.9524 | 1.291 | 0.0002864 |
| rs7760527       | 6 | 12908408 | A,G | 0.6033 | 0.959  | 1.293 | 0.0002573 |
| rs13197912      | 6 | 12908747 | A,T | 0.6446 | 0.9708 | 1.294 | 0.0003239 |
| rs1571999       | 6 | 12909467 | A,G | 0.9637 | 0.6181 | 1.072 | 0.7627    |
| rs6916096       | 6 | 12909738 | T,C | 0.9687 | 0.6894 | 1.07  | 0.7714    |
| rs7454157       | 6 | 12909874 | G,A | 0.6159 | 0.9995 | 1.28  | 0.0003685 |
| rs6917613       | 6 | 12910698 | A,C | 0.9738 | 0.769  | 1.053 | 0.8283    |
| rs12530250      | 6 | 12911965 | A,G | 0.644  | 0.9748 | 1.292 | 0.0003432 |
| rs9381494       | 6 | 12913152 | T,C | 0.6017 | 0.9432 | 1.291 | 0.0003092 |
| rs11752630      | 6 | 12914967 | A,T | 0.9744 | 0.6895 | 1.073 | 0.7835    |
| rs4711863       | 6 | 12915417 | G,C | 0.6412 | 0.9555 | 1.292 | 0.0003758 |
| rs6915761       | 6 | 12915699 | A,G | 0.9672 | 0.6163 | 1.097 | 0.7002    |
| rs17679590      | 6 | 12919148 | G,A | 0.906  | 0.7744 | 1.023 | 0.8633    |
| rs2876303       | 6 | 12919867 | A,G | 0.6011 | 0.9187 | 1.298 | 0.0002815 |
| rs8180558       | 6 | 12919989 | C,T | 0.637  | 0.9364 | 1.295 | 0.0003738 |
| rs111395058     | 6 | 12921714 | A,T | 0.6395 | 0.9444 | 1.295 | 0.0003686 |
| rs9381500       | 6 | 12922535 | A,G | 0.6301 | 0.9194 | 1.287 | 0.0005756 |
| rs9369650       | 6 | 12922652 | A,C | 0.5815 | 0.8305 | 1.304 | 0.0004081 |
| rs2327621       | 6 | 12922689 | A,G | 0.6271 | 0.9093 | 1.287 | 0.0005913 |
| 6:12922721:CA_C | 6 | 12922721 | R,D | 0.6368 | 0.9431 | 1.278 | 0.0007076 |
| rs34343839      | 6 | 12922734 | C,T | 0.6366 | 0.9437 | 1.278 | 0.0007067 |

|            |   |          |     |        |        |       |           |
|------------|---|----------|-----|--------|--------|-------|-----------|
| rs1014342  | 6 | 12923157 | C,T | 0.5775 | 0.8198 | 1.302 | 0.0004781 |
| rs62386818 | 6 | 12923767 | C,A | 0.6314 | 0.9285 | 1.283 | 0.0006197 |
| rs9369652  | 6 | 12924744 | T,C | 0.5789 | 0.8241 | 1.303 | 0.0004442 |
| rs1953088  | 6 | 12925936 | A,C | 0.5785 | 0.8232 | 1.303 | 0.000452  |
| rs12526453 | 6 | 12927544 | C,G | 0.6469 | 0.9995 | 1.27  | 0.0007372 |
| rs4714990  | 6 | 12927845 | T,C | 0.5382 | 0.6953 | 1.314 | 0.0007636 |
| rs6458545  | 6 | 12934302 | G,C | 0.5458 | 0.6533 | 1.323 | 0.0008546 |
| rs7739181  | 6 | 12934687 | G,A | 0.655  | 0.91   | 1.287 | 0.00076   |
| rs13201878 | 6 | 12943066 | A,G | 0.7141 | 0.6899 | 1.347 | 0.001064  |
| rs36119782 | 6 | 13054433 | G,A | 0.821  | 0.6514 | 0.812 | 0.053     |
| rs7762827  | 6 | 13054732 | C,G | 0.7992 | 0.6485 | 0.822 | 0.0564    |
| rs9296592  | 6 | 13055406 | T,C | 0.8007 | 0.6472 | 0.82  | 0.05523   |
| rs9473354  | 6 | 13059035 | C,A | 0.7812 | 0.975  | 0.863 | 0.06867   |
| rs4711908  | 6 | 13060208 | A,G | 0.7796 | 0.9911 | 0.864 | 0.06911   |
| rs4711909  | 6 | 13060214 | C,A | 0.7796 | 0.9915 | 0.864 | 0.06917   |
| rs7738252  | 6 | 13060568 | A,G | 0.7796 | 0.9941 | 0.865 | 0.06907   |
| rs6932757  | 6 | 13063361 | T,G | 0.8085 | 0.8148 | 0.838 | 0.05859   |
| rs9463408  | 6 | 13063824 | A,G | 0.78   | 0.9609 | 0.863 | 0.07091   |
| rs9463410  | 6 | 13064274 | A,G | 0.7797 | 0.9479 | 0.863 | 0.07135   |
| rs9473370  | 6 | 13065071 | A,C | 0.813  | 0.7513 | 0.831 | 0.05943   |
| rs4711910  | 6 | 13066375 | T,C | 0.8303 | 0.6875 | 0.814 | 0.05463   |
| rs35305875 | 6 | 13067511 | A,G | 0.8291 | 0.6768 | 0.813 | 0.05474   |
| rs34952336 | 6 | 13067820 | A,T | 0.8309 | 0.6675 | 0.811 | 0.05383   |
| rs4715082  | 6 | 13068291 | A,G | 0.816  | 0.7067 | 0.826 | 0.06149   |
| rs9463423  | 6 | 13069359 | T,C | 0.7328 | 0.7033 | 0.85  | 0.06954   |
| rs34381599 | 6 | 13071265 | T,G | 0.7441 | 0.6087 | 0.837 | 0.06789   |
| rs35229766 | 6 | 13072206 | T,C | 0.8306 | 0.6032 | 0.803 | 0.05555   |
| rs6458616  | 6 | 13072498 | A,G | 0.7443 | 0.6054 | 0.836 | 0.0683    |
| rs7750120  | 6 | 13072633 | T,C | 0.7329 | 0.6564 | 0.846 | 0.07087   |
| rs9349494  | 6 | 13173147 | G,A | 0.7698 | 0.6137 | 0.924 | 0.4423    |
| rs12528399 | 6 | 13177901 | G,T | 0.7703 | 0.6893 | 0.924 | 0.4178    |
| rs12527257 | 6 | 13178069 | T,C | 0.7715 | 0.6859 | 0.925 | 0.4209    |
| rs9463511  | 6 | 13178259 | G,A | 0.6907 | 0.6203 | 0.917 | 0.3507    |
| rs16873682 | 6 | 13178390 | A,G | 0.7734 | 0.68   | 0.924 | 0.418     |
| rs4097413  | 6 | 13178610 | A,G | 0.7705 | 0.6936 | 0.925 | 0.4173    |
| rs9381807  | 6 | 13179394 | G,A | 0.7703 | 0.6992 | 0.925 | 0.4167    |
| rs11757278 | 6 | 13180454 | T,C | 0.7042 | 0.9932 | 0.933 | 0.3507    |
| rs9381809  | 6 | 13182117 | G,C | 0.7719 | 0.6694 | 0.923 | 0.4191    |
| rs3778646  | 6 | 13182685 | G,T | 0.7724 | 0.6606 | 0.923 | 0.4189    |
| rs3823445  | 6 | 13182995 | G,A | 0.7409 | 0.7795 | 0.924 | 0.3699    |
| rs9381810  | 6 | 13183121 | T,C | 0.7402 | 0.7808 | 0.924 | 0.369     |
| rs9395520  | 6 | 13183523 | C,T | 0.7038 | 0.9226 | 0.931 | 0.355     |
| rs9381812  | 6 | 13183998 | A,G | 0.7399 | 0.768  | 0.924 | 0.3675    |
| rs10948524 | 6 | 13188493 | A,G | 0.7382 | 0.6813 | 0.919 | 0.3658    |
| rs9367368  | 6 | 13189275 | T,C | 0.7354 | 0.6592 | 0.918 | 0.3647    |
| rs9367369  | 6 | 13189941 | A,G | 0.7374 | 0.6641 | 0.918 | 0.3655    |

**Supplemental Table V.** Coordinates of the *PHACTR1* exons that were re-sequenced in 500 early-onset MI cases and 500 controls. We used a custom-made Agilent's SureSelect library for exon capture and non-indexed pooled sequencing to discover variants. We applied the Syzygy software to analyze the sequence data<sup>2</sup>. Results for this re-sequencing experiment are presented in reference<sup>3</sup>.

| <b>Feature name</b> | <b>Coordinates (hg19)</b> |
|---------------------|---------------------------|
| Exon1               | chr6:12825279-12825999    |
| Exon2               | chr6:12826870-12827110    |
| Exon3               | chr6:12857874-12857994    |
| Exon4               | chr6:13161544-13161784    |
| Exon5               | chr6:13268380-13268541    |
| Exon6               | chr6:13290692-13290932    |
| Exon7               | chr6:13314005-13314365    |
| Exon8               | chr6:13335969-13336269    |
| Exon9               | chr6:13338205-13338445    |
| Exon10              | chr6:13381023-13381171    |
| Exon11              | chr6:13386433-13386584    |
| Exon12              | chr6:13391582-13391822    |
| Exon13              | chr6:13394314-13394473    |
| Exon14              | chr6:13395219-13396059    |

**Supplemental Table VI.** List of non-synonymous *PHACTR1* variants identified by whole-exome sequencing of 4,703 myocardial infarction cases and 5,090 controls.

| Variant            | Category              | AminoAcid | MAF (case)  | MAF (control) |
|--------------------|-----------------------|-----------|-------------|---------------|
| 6:12749931 T/A     | NON_SYNONYMOUS_CODING | D53E      | 0           | 0.000196464   |
| 6:12749983 T/C     | NON_SYNONYMOUS_CODING | Y71H      | 0.000106315 | 0             |
| 6:12749994 G/T     | NON_SYNONYMOUS_CODING | E74D      | 0           | 0.000196464   |
| 6:12750019 G/A     | NON_SYNONYMOUS_CODING | A83T      | 0           | 9.82318E-05   |
| 6:12933867 G/A     | NON_SYNONYMOUS_CODING | V85I      | 0.001807357 | 0.006385069   |
| 6:12933894 G/A     | NON_SYNONYMOUS_CODING | A94T      | 0.000106315 | 9.82318E-05   |
| 6:12933907 C/T     | NON_SYNONYMOUS_CODING | P98L      | 0.000106315 | 9.82318E-05   |
| 6:12933912 G/A     | NON_SYNONYMOUS_CODING | V100M     | 0.004252605 | 0.003143418   |
| 6:12933928 G/A     | NON_SYNONYMOUS_CODING | R105H     | 0           | 9.82318E-05   |
| 6:12933942 G/A     | NON_SYNONYMOUS_CODING | E110K     | 0.000106315 | 0             |
| 6:12933945 C/A     | NON_SYNONYMOUS_CODING | L111M     | 0           | 9.82318E-05   |
| 6:12933966 G/A     | NON_SYNONYMOUS_CODING | G118S     | 0           | 9.82318E-05   |
| 6:12933969 C/A     | NON_SYNONYMOUS_CODING | L119I     | 0.001063151 | 0.002652259   |
| 6:12934002 G/A     | NON_SYNONYMOUS_CODING | A130T     | 0.00021263  | 0.000491159   |
| 6:12934033 G/A     | NON_SYNONYMOUS_CODING | G140E     | 0.000106315 | 0             |
| 6:12934044 A/G     | NON_SYNONYMOUS_CODING | T144A     | 0           | 9.82318E-05   |
| 6:12934045 C/T     | NON_SYNONYMOUS_CODING | T144I     | 0.00414629  | 0.004715128   |
| 6:12934055 G/A     | NON_SYNONYMOUS_CODING | M147I     | 0.000106315 | 0             |
| 6:12934059 C/G     | NON_SYNONYMOUS_CODING | P149A     | 0           | 0             |
| 6:12934071 G/C     | NON_SYNONYMOUS_CODING | A153P     | 0.000106315 | 0             |
| 6:12934098 C/A     | NON_SYNONYMOUS_CODING | P162T     | 0           | 9.82318E-05   |
| 6:12934106 G/C     | NON_SYNONYMOUS_CODING | E164D     | 0.000106315 | 9.82318E-05   |
| 6:13053627 G/A     | NON_SYNONYMOUS_CODING | R94H      | 0.000106315 | 0             |
| 6:13053655 C/G     | NON_SYNONYMOUS_CODING | H103Q     | 0           | 9.82318E-05   |
| 6:13182822 T/C     | NON_SYNONYMOUS_CODING | S190P     | 0.000106315 | 0             |
| 6:13182832 C/T     | NON_SYNONYMOUS_CODING | A193V     | 0.000106315 | 0             |
| 6:13182840 G/A     | NON_SYNONYMOUS_CODING | E196K     | 0.000106315 | 0             |
| 6:13182846 G/C     | NON_SYNONYMOUS_CODING | E198Q     | 0.000106315 | 9.82318E-05   |
| 6:13182850 C/G     | NON_SYNONYMOUS_CODING | P199R     | 0.000106315 | 0             |
| 6:13182895 C/T     | NON_SYNONYMOUS_CODING | P100L     | 0           | 9.82318E-05   |
| 6:13182916 C/CAGGT | FRAME_SHIFT           | .         | 0.000106315 | 0             |
| 6:13185044 T/A     | NON_SYNONYMOUS_CODING | S112R     | 0           | 9.82318E-05   |
| 6:13185051 G/A     | NON_SYNONYMOUS_CODING | A115T     | 0.000106315 | 0             |
| 6:13185190 C/T     | NON_SYNONYMOUS_CODING | P130L     | 0           | 9.82318E-05   |
| 6:13185211 C/T     | NON_SYNONYMOUS_CODING | T137I     | 0.000106315 | 0             |
| 6:13185216 A/G     | NON_SYNONYMOUS_CODING | R139G     | 0.000106315 | 0             |
| 6:13185238 G/T     | SPLICE_SITE_DONOR     | .         | 0.000106315 | 0             |
| 6:13206058 C/T     | NON_SYNONYMOUS_CODING | P226S     | 0           | 9.82318E-05   |
| 6:13206074 G/T     | NON_SYNONYMOUS_CODING | C231F     | 0.00021263  | 0             |
| 6:13206089 T/G     | NON_SYNONYMOUS_CODING | L236R     | 0           | 9.82318E-05   |
| 6:13206137 G/C     | NON_SYNONYMOUS_CODING | G107A     | 0           | 0.000196464   |
| 6:13206174 G/C     | NON_SYNONYMOUS_CODING | Q119H     | 0.000106315 | 0             |
| 6:13206259 G/A     | NON_SYNONYMOUS_CODING | G148S     | 0           | 9.82318E-05   |
| 6:13206262 C/A     | NON_SYNONYMOUS_CODING | Q149K     | 0           | 9.82318E-05   |
| 6:13206283 G/A     | NON_SYNONYMOUS_CODING | G156S     | 0.00021263  | 9.82318E-05   |
| 6:13206302 C/T     | NON_SYNONYMOUS_CODING | P162L     | 0.00021263  | 0             |
| 6:13228059 G/A     | NON_SYNONYMOUS_CODING | R188Q     | 0           | 9.82318E-05   |
| 6:13228112 G/T     | NON_SYNONYMOUS_CODING | V206F     | 0           | 9.82318E-05   |
| 6:13228125 G/A     | NON_SYNONYMOUS_CODING | G210E     | 0           | 9.82318E-05   |
| 6:13228130 A/G     | NON_SYNONYMOUS_CODING | M212V     | 0           | 0.000196464   |
| 6:13228170 T/C     | NON_SYNONYMOUS_CODING | I225T     | 0           | 9.82318E-05   |
| 6:13228256 G/A     | NON_SYNONYMOUS_CODING | E254K     | 0           | 9.82318E-05   |
| 6:13230271 T/A     | NON_SYNONYMOUS_CODING | S268T     | 0.00021263  | 9.82318E-05   |
| 6:13230385 C/T     | NON_SYNONYMOUS_CODING | R306W     | 0           | 0.000589391   |

|                |                       |       |             |             |
|----------------|-----------------------|-------|-------------|-------------|
| 6:13230430_G/C | NON_SYNONYMOUS_CODING | G154A | 0           | 9.82318E-05 |
| 6:13230435_C/T | NON_SYNONYMOUS_CODING | R156W | 0.000531576 | 0.000589391 |
| 6:13273058_T/C | NON_SYNONYMOUS_CODING | M17T  | 0           | 9.82318E-05 |
| 6:13273059_G/C | NON_SYNONYMOUS_CODING | M17I  | 0           | 0           |
| 6:13273069_C/T | NON_SYNONYMOUS_CODING | L21F  | 0.000106315 | 0           |
| 6:13273087_C/T | NON_SYNONYMOUS_CODING | R27C  | 0.000106315 | 0           |
| 6:13273088_G/A | NON_SYNONYMOUS_CODING | R27H  | 0.005315756 | 0.002946955 |
| 6:13273094_G/A | NON_SYNONYMOUS_CODING | R29Q  | 0.000106315 | 0           |
| 6:13283684_C/T | NON_SYNONYMOUS_CODING | R369W | 0.000106315 | 0           |
| 6:13283705_C/T | NON_SYNONYMOUS_CODING | R376C | 0.000106315 | 0           |
| 6:13283756_G/A | NON_SYNONYMOUS_CODING | A102T | 0           | 0           |
| 6:13283774_C/T | NON_SYNONYMOUS_CODING | R108C | 0           | 9.82318E-05 |
| 6:13283804_G/A | NON_SYNONYMOUS_CODING | G118R | 0.00021263  | 0.000589391 |
| 6:13283807_G/T | STOP_GAINED           | E119* | 0           | 9.82318E-05 |
| 6:13283826_G/T | NON_SYNONYMOUS_CODING | G125V | 0.000106315 | 0           |
| 6:13286415_C/G | NON_SYNONYMOUS_CODING | T127S | 0.000106315 | 0           |
| 6:13288638_G/T | NON_SYNONYMOUS_CODING | R433L | 0           | 9.82318E-05 |



**Supplemental Table VII.** Clinical description of the 25 patients that underwent heart transplant at the Montreal Heart Institute. We used the right coronary arteries from these patients in our expression quantitative trait locus (eQTL) experiment. Sex and clinical diagnostic are not associated with *PHACTR1* expression levels ( $P>0.12$ ). Histological characterization corresponds to the state (healthy or diseased) of the coronary artery when it was harvested. *PHACTR1* expression levels are higher in diseased coronaries ( $P=0.0092$ ). In a predictive model (linear regression) of *PHACTR1* expression levels, when we adjust for coronary artery disease status, the association at rs9349379 remains significant ( $P=0.0016$ ).

| Patient ID | Sex    | Clinical diagnostic                     | Histological characterization |
|------------|--------|-----------------------------------------|-------------------------------|
| 1          | Female | Post radio-/chemotherapy cardiomyopathy | Diseased                      |
| 2          | Female | Viral cardiomyopathy                    | Healthy                       |
| 3          | Male   | Dilated cardiomyopathy                  | Healthy                       |
| 4          | Male   | Ischemic cardiomyopathy                 | Diseased                      |
| 5          | Male   | Dilated cardiomyopathy                  | Diseased                      |
| 6          | Female | Ischemic cardiomyopathy                 | Diseased                      |
| 7          | Female | Idiopathic cardiomyopathy               | Diseased                      |
| 8          | Male   | Dilated cardiomyopathy                  | Diseased                      |
| 9          | Male   | Hypertrophic cardiomyopathy             | Diseased                      |
| 10         | Male   | Ischemic cardiomyopathy                 | Diseased                      |
| 11         | Female | Ischemic cardiomyopathy                 | Diseased                      |
| 12         | Male   | Ischemic cardiomyopathy                 | Diseased                      |
| 13         | Male   | Dilated cardiomyopathy                  | Healthy                       |
| 14         | Female | Hypertrophic cardiomyopathy             | Healthy                       |
| 15         | Male   | Ischemic cardiomyopathy                 | Healthy                       |
| 16         | Male   | Ischemic cardiomyopathy                 | Healthy                       |
| 17         | Male   | Dilated cardiomyopathy                  | Healthy                       |
| 18         | Male   | Ischemic cardiomyopathy                 | Diseased                      |
| 19         | Female | Dilated cardiomyopathy                  | Healthy                       |
| 20         | Male   | Myocarditis                             | Diseased                      |
| 21         | Male   | Dilated cardiomyopathy                  | Healthy                       |
| 22         | Male   | Dilated cardiomyopathy                  | Healthy                       |
| 23         | Female | Hypertrophic cardiomyopathy             | Healthy                       |
| 24         | Female | Post radio-/chemotherapy cardiomyopathy | Healthy                       |
| 25         | Female | Dilated cardiomyopathy                  | Healthy                       |

**Supplemental Table VIII.** Association results between *PHACTR1* expression levels in 25 human right coronary artery samples and *PHACTR1* SNPs. For analysis, we only kept markers with an imputation quality >0.6. We sorted results based on their association P-value with *PHACTR1* expression levels. Three variants (rs60844130, rs12215445, rs113606396) are marginally more significant than rs9349379, but they become non-significant after conditioning on genotypes at rs9349379. Given the very small sample size (n=25), these marginal differences could be due to statistical fluctuations. Moreover, these three markers are not associated with MI in the MHI Biobank.

| Marker           | Chromosome | Position (hg19) | ALLELES    | Frequency (allele 1) | Imputation (rsq_hat) | Effect        | P-value        | P-value (conditional on rs9349379) |
|------------------|------------|-----------------|------------|----------------------|----------------------|---------------|----------------|------------------------------------|
| rs60844130       | 6          | 12865503        | C,G        | 0.8155               | 0.8494               | 1.185         | 0.01011        | 0.1419                             |
| rs12215445       | 6          | 12803314        | G,A        | 0.8185               | 0.6514               | 1.241         | 0.01022        | 0.0966                             |
| rs113606396      | 6          | 12868263        | G,A        | 0.8111               | 0.7827               | 1.157         | 0.01609        | 0.165                              |
| <b>rs9349379</b> | <b>6</b>   | <b>12903957</b> | <b>A,G</b> | <b>0.5998</b>        | <b>0.9911</b>        | <b>-0.581</b> | <b>0.01831</b> | <b>NA</b>                          |
| rs10807323       | 6          | 12795031        | G,A        | 0.6644               | 0.7128               | -0.649        | 0.06512        | 0.8933                             |
| rs9381401        | 6          | 12801967        | A,C        | 0.6665               | 0.763                | -0.626        | 0.0663         | 0.8977                             |
| rs2026458        | 6          | 12825874        | C,T        | 0.6599               | 1                    | -0.525        | 0.07456        | 0.8498                             |
| 6:12835139:GT_G  | 6          | 12835139        | R,D        | 0.6604               | 0.9839               | -0.531        | 0.07667        | 0.8521                             |
| rs12215208       | 6          | 12850294        | C,T        | 0.6617               | 0.9525               | -0.523        | 0.08557        | 0.882                              |
| rs7454157        | 6          | 12909874        | G,A        | 0.6398               | 1                    | 0.463         | 0.09324        | 1                                  |
| rs9296512        | 6          | 12894904        | C,G        | 0.6343               | 0.8887               | 0.475         | 0.1044         | 0.9362                             |
| rs1332844        | 6          | 12889004        | T,C        | 0.6462               | 0.9202               | 0.458         | 0.1154         | 0.9779                             |
| rs9369640        | 6          | 12901441        | A,C        | 0.6365               | 0.9277               | 0.449         | 0.1163         | 0.8974                             |
| rs2876302        | 6          | 12907412        | A,G        | 0.6017               | 0.8599               | 0.455         | 0.1166         | 0.8455                             |
| rs7751826        | 6          | 12900977        | T,C        | 0.6361               | 0.9252               | 0.449         | 0.1168         | 0.8976                             |
| rs2876301        | 6          | 12907411        | T,C        | 0.5957               | 0.8399               | 0.459         | 0.1183         | 0.8451                             |
| rs7750679        | 6          | 12891301        | C,T        | 0.642                | 0.9131               | 0.454         | 0.1197         | 0.9231                             |
| rs6911226        | 6          | 12902290        | G,A        | 0.6329               | 0.9296               | 0.442         | 0.1207         | 0.8642                             |
| rs13208248       | 6          | 12883524        | C,A        | 0.6696               | 0.9159               | 0.483         | 0.1227         | 0.9432                             |
| rs6925904        | 6          | 12892486        | G,A        | 0.6441               | 0.9223               | 0.449         | 0.1227         | 0.8995                             |
| rs2876303        | 6          | 12919867        | A,G        | 0.6227               | 0.9143               | 0.436         | 0.1236         | 0.8206                             |
| rs6915983        | 6          | 12902441        | G,T        | 0.6325               | 0.9232               | 0.439         | 0.1247         | 0.8511                             |
| rs35355695       | 6          | 12891103        | G,T        | 0.6986               | 1                    | 0.48          | 0.129          | 0.9797                             |
| rs2327620        | 6          | 12907591        | G,A        | 0.6222               | 0.9657               | 0.419         | 0.1297         | 0.8063                             |
| rs13197912       | 6          | 12908747        | A,T        | 0.6782               | 0.9852               | 0.442         | 0.131          | 0.9778                             |
| rs4711863        | 6          | 12915417        | G,C        | 0.6765               | 0.964                | 0.444         | 0.131          | 0.9652                             |
| rs1332846        | 6          | 12892523        | T,A        | 0.703                | 1                    | 0.479         | 0.132          | 0.9736                             |
| rs1332847        | 6          | 12892754        | C,T        | 0.7031               | 1                    | 0.479         | 0.1321         | 0.9738                             |
| rs13219256       | 6          | 12898292        | C,T        | 0.7033               | 0.9987               | 0.48          | 0.1322         | 0.9757                             |
| rs4714951        | 6          | 12897307        | C,T        | 0.7032               | 0.9992               | 0.48          | 0.1322         | 0.9754                             |
| rs12530250       | 6          | 12911965        | A,G        | 0.6782               | 0.9914               | 0.439         | 0.1323         | 0.9801                             |
| rs1332845        | 6          | 12892456        | A,G        | 0.7034               | 1                    | 0.48          | 0.1323         | 0.9739                             |
| rs34944538       | 6          | 12889145        | A,G        | 0.7                  | 1                    | 0.47          | 0.1349         | 0.9809                             |
| rs62389954       | 6          | 12896740        | G,A        | 0.6979               | 0.9781               | 0.48          | 0.1365         | 0.964                              |
| rs2876300        | 6          | 12894103        | A,G        | 0.698                | 0.9804               | 0.479         | 0.1366         | 0.9669                             |
| rs111395058      | 6          | 12921714        | A,T        | 0.6731               | 0.9407               | 0.44          | 0.1388         | 0.8994                             |
| rs71562459       | 6          | 12888602        | G,C        | 0.6986               | 1                    | 0.465         | 0.1398         | 0.9918                             |
| rs4714955        | 6          | 12903435        | C,T        | 0.6811               | 1                    | 0.427         | 0.1432         | 0.9632                             |
| rs62389955       | 6          | 12902248        | A,G        | 0.6798               | 1                    | 0.428         | 0.1436         | 0.9547                             |
| rs7760527        | 6          | 12908408        | A,G        | 0.6176               | 0.9614               | 0.402         | 0.1436         | 0.7543                             |

|                 |   |          |     |        |        |        |        |        |
|-----------------|---|----------|-----|--------|--------|--------|--------|--------|
| rs9381494       | 6 | 12913152 | T,C | 0.6154 | 0.9445 | 0.397  | 0.1504 | 0.7296 |
| rs7760016       | 6 | 12908077 | A,G | 0.615  | 0.9606 | 0.393  | 0.1518 | 0.727  |
| rs8180558       | 6 | 12919989 | C,T | 0.6679 | 0.9247 | 0.429  | 0.1525 | 0.8466 |
| rs9395214       | 6 | 12898884 | G,C | 0.6125 | 0.9496 | 0.388  | 0.1594 | 0.7098 |
| rs9369650       | 6 | 12922652 | A,C | 0.611  | 0.8013 | 0.402  | 0.1764 | 0.6555 |
| rs6917613       | 6 | 12910698 | A,C | 0.975  | 0.6361 | 1.567  | 0.1779 | 0.4188 |
| rs9369652       | 6 | 12924744 | T,C | 0.611  | 0.7998 | 0.401  | 0.1779 | 0.6527 |
| rs1953088       | 6 | 12925936 | A,C | 0.611  | 0.7988 | 0.4    | 0.1789 | 0.6512 |
| rs1014342       | 6 | 12923157 | C,T | 0.6082 | 0.7977 | 0.395  | 0.1832 | 0.6359 |
| 6:12922721:CA_C | 6 | 12922721 | R,D | 0.6855 | 0.9496 | 0.389  | 0.1887 | 0.7815 |
| rs34343839      | 6 | 12922734 | C,T | 0.6854 | 0.9502 | 0.388  | 0.1889 | 0.7811 |
| rs12526453      | 6 | 12927544 | C,G | 0.6998 | 1      | 0.374  | 0.1926 | 0.813  |
| rs9381500       | 6 | 12922535 | A,G | 0.6711 | 0.903  | 0.389  | 0.1926 | 0.7075 |
| rs7739181       | 6 | 12934687 | G,A | 0.7024 | 0.9579 | 0.382  | 0.1971 | 0.8072 |
| rs2327621       | 6 | 12922689 | A,G | 0.6652 | 0.89   | 0.385  | 0.1993 | 0.6729 |
| rs62389950      | 6 | 12868726 | C,T | 0.8952 | 0.8702 | 0.687  | 0.1998 | 0.2064 |
| rs62386818      | 6 | 12923767 | C,A | 0.6801 | 0.928  | 0.382  | 0.2008 | 0.7303 |
| rs4714990       | 6 | 12927845 | T,C | 0.5764 | 0.6851 | 0.408  | 0.2059 | 0.6434 |
| rs6458545       | 6 | 12934302 | G,C | 0.5826 | 0.6602 | 0.408  | 0.2152 | 0.6405 |
| rs13201878      | 6 | 12943066 | A,G | 0.7276 | 0.7716 | 0.442  | 0.2197 | 0.7118 |
| rs6912532       | 6 | 12860762 | T,C | 0.938  | 0.9292 | 0.746  | 0.2398 | 0.1375 |
| rs16873462      | 6 | 12862244 | G,A | 0.9454 | 0.9001 | 0.775  | 0.2563 | 0.1189 |
| rs62389900      | 6 | 12862200 | G,T | 0.9454 | 0.9001 | 0.775  | 0.2563 | 0.1189 |
| rs6914467       | 6 | 12864309 | G,A | 0.9454 | 0.9013 | 0.774  | 0.2564 | 0.1188 |
| rs34348949      | 6 | 12863250 | A,G | 0.9454 | 0.9006 | 0.774  | 0.2565 | 0.119  |
| rs6927781       | 6 | 12860987 | G,C | 0.9455 | 0.8994 | 0.775  | 0.2566 | 0.119  |
| rs13198167      | 6 | 12858242 | G,A | 0.9455 | 0.8976 | 0.775  | 0.2567 | 0.1192 |
| rs35621699      | 6 | 12858904 | T,C | 0.9455 | 0.8981 | 0.775  | 0.2567 | 0.1192 |
| rs35395772      | 6 | 12857393 | G,A | 0.9455 | 0.8974 | 0.775  | 0.2569 | 0.1194 |
| rs36043593      | 6 | 12850604 | C,T | 0.9449 | 0.886  | 0.77   | 0.2613 | 0.1246 |
| rs62389889      | 6 | 12849622 | G,T | 0.945  | 0.8855 | 0.77   | 0.2615 | 0.1248 |
| rs13194950      | 6 | 12844775 | G,A | 0.9451 | 0.8824 | 0.771  | 0.262  | 0.1251 |
| rs55803153      | 6 | 12866927 | G,A | 0.9417 | 0.8687 | 0.736  | 0.276  | 0.1492 |
| rs13215145      | 6 | 12827170 | G,A | 0.9455 | 0.8579 | 0.762  | 0.2761 | 0.1308 |
| rs9463423       | 6 | 13069359 | T,C | 0.779  | 0.6377 | -0.444 | 0.2779 | 0.6959 |
| rs9473354       | 6 | 13059035 | C,A | 0.8408 | 0.998  | -0.401 | 0.2781 | 0.7544 |
| rs7738252       | 6 | 13060568 | A,G | 0.84   | 1      | -0.395 | 0.2793 | 0.7545 |
| rs4711908       | 6 | 13060208 | A,G | 0.8399 | 1      | -0.395 | 0.2799 | 0.7554 |
| rs4711909       | 6 | 13060214 | C,A | 0.8399 | 1      | -0.395 | 0.2799 | 0.7554 |
| rs6932757       | 6 | 13063361 | T,G | 0.8591 | 0.8503 | -0.459 | 0.2804 | 0.7873 |
| rs9473370       | 6 | 13065071 | A,C | 0.8622 | 0.766  | -0.489 | 0.2813 | 0.8025 |
| rs9463410       | 6 | 13064274 | A,G | 0.8381 | 0.941  | -0.408 | 0.2814 | 0.7617 |
| rs9463408       | 6 | 13063824 | A,G | 0.8386 | 0.9471 | -0.407 | 0.2815 | 0.7616 |
| rs36119782      | 6 | 13054433 | G,A | 0.8646 | 0.6631 | -0.527 | 0.283  | 0.8084 |
| rs7762827       | 6 | 13054732 | C,G | 0.8449 | 0.6352 | -0.506 | 0.2838 | 0.7841 |
| rs35229766      | 6 | 13072206 | T,C | 0.8709 | 0.6329 | -0.553 | 0.2857 | 0.8384 |
| rs9296592       | 6 | 13055406 | T,C | 0.846  | 0.6504 | -0.5   | 0.2859 | 0.7827 |
| rs13205779      | 6 | 12856004 | A,G | 0.9326 | 0.9094 | 0.661  | 0.2861 | 0.2007 |
| rs6914233       | 6 | 12854443 | T,C | 0.9326 | 0.9089 | 0.661  | 0.2862 | 0.2008 |
| rs34952336      | 6 | 13067820 | A,T | 0.8731 | 0.6878 | -0.534 | 0.2863 | 0.8379 |
| rs35305875      | 6 | 13067511 | A,G | 0.8719 | 0.696  | -0.527 | 0.2876 | 0.8378 |
| rs4711910       | 6 | 13066375 | T,C | 0.8734 | 0.7093 | -0.524 | 0.2887 | 0.8369 |
| rs6900427       | 6 | 12851560 | G,A | 0.9321 | 0.908  | 0.652  | 0.2915 | 0.2089 |
| rs4715082       | 6 | 13068291 | A,G | 0.8609 | 0.7147 | -0.493 | 0.293  | 0.83   |
| rs13215300      | 6 | 12817608 | T,C | 0.9482 | 0.8102 | 0.765  | 0.2996 | 0.1365 |
| rs13215271      | 6 | 12817748 | A,G | 0.9482 | 0.8113 | 0.765  | 0.2998 | 0.1364 |

|                 |   |          |     |        |        |       |        |        |
|-----------------|---|----------|-----|--------|--------|-------|--------|--------|
| rs35784087      | 6 | 12818204 | T,C | 0.9482 | 0.8124 | 0.764 | 0.3002 | 0.1365 |
| rs62389894      | 6 | 12854962 | A,T | 0.9401 | 0.8506 | 0.7   | 0.3002 | 0.175  |
| rs13191496      | 6 | 12851625 | G,A | 0.9401 | 0.8492 | 0.7   | 0.3005 | 0.1753 |
| rs62389221      | 6 | 12815161 | A,G | 0.9482 | 0.8019 | 0.768 | 0.3006 | 0.1369 |
| rs62389892      | 6 | 12853979 | A,G | 0.9401 | 0.8501 | 0.7   | 0.3008 | 0.1754 |
| rs35227817      | 6 | 12866528 | G,A | 0.9492 | 0.8512 | 0.748 | 0.3025 | 0.1316 |
| rs55637633      | 6 | 12868320 | C,A | 0.949  | 0.8492 | 0.747 | 0.3029 | 0.1324 |
| 6:12857625:CG_C | 6 | 12857625 | R,D | 0.9493 | 0.8472 | 0.749 | 0.303  | 0.1321 |
| rs62389893      | 6 | 12854881 | G,T | 0.9485 | 0.8355 | 0.741 | 0.309  | 0.1396 |
| rs7741088       | 6 | 12834122 | C,T | 0.9485 | 0.8235 | 0.744 | 0.3104 | 0.1403 |
| rs62389223      | 6 | 12819405 | C,T | 0.949  | 0.8037 | 0.754 | 0.312  | 0.1408 |
| rs35954478      | 6 | 12867215 | A,G | 0.9373 | 0.8379 | 0.657 | 0.3257 | 0.2208 |
| rs146401688     | 6 | 12888498 | C,T | 0.9634 | 0.8865 | 0.794 | 0.3342 | 0.4268 |
| rs28734939      | 6 | 12837663 | T,A | 0.8932 | 0.7447 | 0.509 | 0.3425 | 0.3082 |
| rs9395161       | 6 | 12838334 | C,T | 0.8592 | 0.9085 | 0.376 | 0.345  | 0.2874 |
| rs9395162       | 6 | 12838532 | T,A | 0.8592 | 0.9086 | 0.376 | 0.3453 | 0.2875 |
| rs13192509      | 6 | 12840877 | C,G | 0.8594 | 0.9126 | 0.375 | 0.3458 | 0.2876 |
| rs1537337       | 6 | 12843006 | G,A | 0.8605 | 0.9204 | 0.37  | 0.3511 | 0.2899 |
| rs9369605       | 6 | 12843219 | A,C | 0.8605 | 0.9203 | 0.37  | 0.3511 | 0.2899 |
| rs9367239       | 6 | 12844465 | A,G | 0.8603 | 0.9212 | 0.369 | 0.3519 | 0.2906 |
| rs9381436       | 6 | 12844405 | C,T | 0.8603 | 0.9212 | 0.369 | 0.3519 | 0.2906 |
| rs13192344      | 6 | 12844264 | C,A | 0.8603 | 0.921  | 0.369 | 0.3523 | 0.291  |
| rs16873449      | 6 | 12844141 | A,T | 0.8603 | 0.921  | 0.369 | 0.3523 | 0.291  |
| rs16873447      | 6 | 12844001 | A,T | 0.8603 | 0.9209 | 0.369 | 0.3524 | 0.2912 |
| rs2184027       | 6 | 12844712 | A,G | 0.8603 | 0.9214 | 0.369 | 0.3525 | 0.291  |
| rs2065490       | 6 | 12847494 | T,C | 0.8602 | 0.924  | 0.368 | 0.3526 | 0.2906 |
| rs4711845       | 6 | 12845156 | A,G | 0.8603 | 0.9215 | 0.369 | 0.3527 | 0.2912 |
| rs9296486       | 6 | 12848969 | T,G | 0.8602 | 0.9245 | 0.368 | 0.3527 | 0.2904 |
| rs9367240       | 6 | 12848685 | C,T | 0.8602 | 0.9243 | 0.368 | 0.3527 | 0.2904 |
| rs2065491       | 6 | 12847595 | A,T | 0.8602 | 0.9241 | 0.368 | 0.353  | 0.2907 |
| rs9381439       | 6 | 12849678 | G,A | 0.8602 | 0.9249 | 0.368 | 0.3532 | 0.2908 |
| rs4711842       | 6 | 12842531 | G,A | 0.8598 | 0.9178 | 0.367 | 0.3552 | 0.2973 |
| rs1537334       | 6 | 12841241 | C,G | 0.8595 | 0.9179 | 0.366 | 0.3559 | 0.2983 |
| rs1537336       | 6 | 12842883 | C,A | 0.8614 | 0.9118 | 0.366 | 0.3601 | 0.296  |
| rs62389220      | 6 | 12815105 | C,G | 0.952  | 0.7639 | 0.718 | 0.3613 | 0.1562 |
| rs9349350       | 6 | 12842285 | A,G | 0.8576 | 0.9032 | 0.359 | 0.3663 | 0.3195 |
| rs1412742       | 6 | 12840104 | G,A | 0.8548 | 0.906  | 0.355 | 0.3692 | 0.3326 |
| rs9381435       | 6 | 12838426 | C,T | 0.8546 | 0.9026 | 0.356 | 0.3694 | 0.3328 |
| rs1412743       | 6 | 12840112 | C,G | 0.8548 | 0.9062 | 0.355 | 0.3695 | 0.3327 |
| 6:12840537:G_GA | 6 | 12840537 | R,I | 0.8548 | 0.9064 | 0.355 | 0.3702 | 0.3331 |
| rs16873436      | 6 | 12841033 | G,C | 0.8548 | 0.9065 | 0.355 | 0.3702 | 0.3331 |
| rs1537338       | 6 | 12843203 | A,G | 0.8619 | 0.9076 | 0.358 | 0.3711 | 0.3036 |
| rs6458493       | 6 | 12835673 | G,A | 0.8541 | 0.9012 | 0.354 | 0.3714 | 0.3347 |
| rs6458494       | 6 | 12836186 | T,C | 0.8542 | 0.9008 | 0.354 | 0.3717 | 0.3349 |
| rs4714913       | 6 | 12845085 | C,T | 0.856  | 0.9149 | 0.35  | 0.3749 | 0.3333 |
| rs4711848       | 6 | 12845240 | C,A | 0.8555 | 0.9146 | 0.348 | 0.3776 | 0.337  |
| rs3945322       | 6 | 12841306 | G,A | 0.8552 | 0.9133 | 0.347 | 0.3795 | 0.3437 |
| rs9357503       | 6 | 12841985 | T,A | 0.8552 | 0.9138 | 0.347 | 0.3797 | 0.3439 |
| rs1537335       | 6 | 12842563 | G,A | 0.8552 | 0.914  | 0.347 | 0.38   | 0.3442 |
| rs5017386       | 6 | 12842373 | G,T | 0.8552 | 0.9139 | 0.347 | 0.3802 | 0.3443 |
| 6:12828114:AG_A | 6 | 12828114 | R,D | 0.8572 | 0.8986 | 0.35  | 0.3816 | 0.3355 |
| rs9349352       | 6 | 12846517 | C,T | 0.8549 | 0.9172 | 0.344 | 0.3821 | 0.3452 |
| rs9296488       | 6 | 12849304 | A,G | 0.8548 | 0.9183 | 0.344 | 0.3823 | 0.3454 |
| rs35657920      | 6 | 12855243 | A,C | 0.8535 | 0.9073 | 0.341 | 0.3863 | 0.3381 |
| rs9395185       | 6 | 12856827 | A,G | 0.8534 | 0.9067 | 0.341 | 0.3863 | 0.3382 |
| rs10434854      | 6 | 12822566 | C,T | 0.8558 | 0.8892 | 0.346 | 0.3884 | 0.3495 |

|                 |   |          |     |        |        |        |        |         |
|-----------------|---|----------|-----|--------|--------|--------|--------|---------|
| rs9472672       | 6 | 12821258 | A,G | 0.8517 | 0.88   | 0.343  | 0.3893 | 0.3471  |
| rs6924353       | 6 | 12860700 | C,T | 0.9576 | 0.7457 | 0.725  | 0.3894 | 0.1583  |
| rs1537340       | 6 | 12881855 | G,A | 0.6686 | 0.9196 | 0.283  | 0.3919 | 0.6407  |
| rs56408440      | 6 | 12824700 | C,T | 0.8553 | 0.8951 | 0.341  | 0.3923 | 0.3564  |
| rs57387500      | 6 | 12824892 | A,G | 0.8551 | 0.8968 | 0.341  | 0.3927 | 0.3565  |
| rs4142300       | 6 | 12825772 | A,G | 0.8551 | 0.8993 | 0.34   | 0.3929 | 0.3571  |
| rs16873431      | 6 | 12840508 | T,C | 0.8641 | 0.8912 | 0.347  | 0.3932 | 0.3195  |
| rs9381427       | 6 | 12830144 | T,C | 0.8543 | 0.8944 | 0.337  | 0.3967 | 0.3553  |
| 6:12828992:T_TA | 6 | 12828992 | R,I | 0.8479 | 0.758  | 0.299  | 0.4757 | 0.4197  |
| rs7770745       | 6 | 12862978 | A,T | 0.6897 | 0.9754 | -0.23  | 0.4792 | 0.1313  |
| rs6458503       | 6 | 12859556 | C,T | 0.687  | 0.9874 | -0.226 | 0.4826 | 0.1315  |
| rs7748950       | 6 | 12858223 | T,C | 0.687  | 0.9872 | -0.226 | 0.4829 | 0.1316  |
| rs72835698      | 6 | 12858776 | G,A | 0.9422 | 0.9429 | 0.427  | 0.5097 | 0.8468  |
| rs62389896      | 6 | 12855854 | A,G | 0.9425 | 0.9422 | 0.427  | 0.5114 | 0.8457  |
| rs9381455       | 6 | 12864898 | C,T | 0.6717 | 0.9226 | -0.218 | 0.5125 | 0.1287  |
| rs62389228      | 6 | 12832840 | A,G | 0.9432 | 0.9011 | 0.428  | 0.522  | 0.8485  |
| rs9463187       | 6 | 12839176 | A,C | 0.698  | 0.9955 | -0.194 | 0.5428 | 0.1917  |
| rs59402659      | 6 | 12853162 | A,G | 0.7    | 1      | -0.189 | 0.5479 | 0.1948  |
| rs7771962       | 6 | 12863738 | T,C | 0.7002 | 1      | -0.188 | 0.551  | 0.1963  |
| rs1360579       | 6 | 12871736 | G,A | 0.6417 | 1      | -0.188 | 0.5729 | 0.2409  |
| rs1412744       | 6 | 12867696 | A,G | 0.6399 | 1      | -0.186 | 0.5743 | 0.2401  |
| rs66867947      | 6 | 12874672 | T,G | 0.64   | 1      | -0.185 | 0.5756 | 0.2417  |
| rs9472777       | 6 | 12872092 | G,A | 0.6398 | 1      | -0.185 | 0.5762 | 0.2415  |
| rs1332841       | 6 | 12875054 | G,T | 0.6405 | 1      | -0.183 | 0.5809 | 0.2405  |
| rs12528956      | 6 | 12833077 | T,C | 0.7079 | 0.9621 | -0.173 | 0.5963 | 0.1976  |
| rs17679286      | 6 | 12828434 | A,G | 0.9434 | 0.7255 | 0.397  | 0.5984 | 0.8037  |
| rs17679417      | 6 | 12863108 | A,T | 0.7076 | 0.9858 | -0.168 | 0.6011 | 0.2003  |
| rs17679501      | 6 | 12879996 | T,A | 0.6507 | 0.9741 | -0.155 | 0.6459 | 0.2307  |
| rs4711857       | 6 | 12880109 | C,T | 0.6511 | 0.9742 | -0.155 | 0.6459 | 0.2299  |
| rs17679590      | 6 | 12919148 | G,A | 0.9328 | 0.7735 | 0.305  | 0.6481 | 0.9786  |
| rs9472786       | 6 | 12877597 | G,T | 0.6494 | 0.9807 | -0.153 | 0.6496 | 0.2459  |
| rs4714946       | 6 | 12872220 | G,A | 0.65   | 0.9794 | -0.15  | 0.6561 | 0.2559  |
| rs9472790       | 6 | 12879101 | T,A | 0.4823 | 0.9748 | 0.145  | 0.6653 | 0.5074  |
| rs9381417       | 6 | 12823820 | G,A | 0.9153 | 0.8452 | 0.246  | 0.6731 | 0.7923  |
| rs58666803      | 6 | 12824263 | T,C | 0.9167 | 0.8207 | 0.248  | 0.6778 | 0.7942  |
| rs35278288      | 6 | 12826700 | A,G | 0.915  | 0.8471 | 0.241  | 0.6782 | 0.8055  |
| rs6915585       | 6 | 12831273 | G,A | 0.9152 | 0.8478 | 0.241  | 0.6788 | 0.8056  |
| rs4711858       | 6 | 12880131 | T,C | 0.655  | 0.9626 | -0.139 | 0.6807 | 0.2425  |
| rs1571996       | 6 | 12834714 | T,C | 0.915  | 0.8468 | 0.239  | 0.6813 | 0.8055  |
| rs9381462       | 6 | 12873775 | G,A | 0.48   | 1      | 0.13   | 0.6959 | 0.5299  |
| rs1571997       | 6 | 12874309 | A,G | 0.4767 | 1      | 0.128  | 0.7023 | 0.5246  |
| rs944767        | 6 | 12788029 | C,G | 0.7091 | 0.7481 | -0.128 | 0.7113 | 0.2112  |
| rs7768030       | 6 | 12822973 | A,C | 0.9102 | 0.8184 | 0.203  | 0.7259 | 0.9134  |
| rs10434855      | 6 | 12822711 | C,A | 0.9102 | 0.8162 | 0.201  | 0.7288 | 0.9168  |
| rs4711841       | 6 | 12818142 | G,C | 0.6001 | 1      | -0.098 | 0.734  | 0.2478  |
| rs1412741       | 6 | 12817667 | A,G | 0.6001 | 1      | -0.098 | 0.7344 | 0.248   |
| rs8180628       | 6 | 12881163 | G,A | 0.6217 | 1      | -0.096 | 0.7378 | 0.08591 |
| rs9349494       | 6 | 13173147 | G,A | 0.7905 | 0.6554 | 0.175  | 0.7428 | 0.4822  |
| rs17617491      | 6 | 12862562 | C,T | 0.9239 | 0.9536 | 0.185  | 0.7471 | 0.8228  |
| rs55879442      | 6 | 12859873 | T,C | 0.9254 | 0.9408 | 0.185  | 0.7511 | 0.8237  |
| rs1011188       | 6 | 12812948 | A,G | 0.926  | 0.8645 | 0.193  | 0.7519 | 0.834   |
| rs12528247      | 6 | 12835880 | C,A | 0.9254 | 0.923  | 0.186  | 0.7529 | 0.8284  |
| rs2151221       | 6 | 12816578 | C,G | 0.9253 | 0.8984 | 0.188  | 0.7529 | 0.8344  |
| rs78881531      | 6 | 12872817 | C,T | 0.9801 | 1      | 0.322  | 0.7536 | 0.852   |
| rs60954427      | 6 | 12824264 | G,A | 0.9263 | 0.8834 | 0.189  | 0.7547 | 0.8205  |
| rs56270763      | 6 | 12810945 | C,T | 0.9256 | 0.8519 | 0.191  | 0.7556 | 0.8377  |

|                 |   |          |     |        |        |        |        |        |
|-----------------|---|----------|-----|--------|--------|--------|--------|--------|
| rs73722849      | 6 | 12795009 | G,A | 0.9278 | 0.7548 | 0.205  | 0.7566 | 0.8338 |
| rs12525116      | 6 | 12809740 | T,C | 0.9258 | 0.8463 | 0.191  | 0.7573 | 0.835  |
| 6:12835490:G_GA | 6 | 12835490 | R,I | 0.9239 | 0.906  | 0.182  | 0.7575 | 0.8289 |
| rs1831706       | 6 | 12898178 | T,C | 0.975  | 0.7486 | 0.325  | 0.7579 | 0.7875 |
| rs1831705       | 6 | 12898162 | G,A | 0.9801 | 0.9398 | 0.326  | 0.7586 | 0.8424 |
| rs77664195      | 6 | 12824994 | A,G | 0.9227 | 0.9129 | 0.179  | 0.7591 | 0.8341 |
| rs1332842       | 6 | 12879851 | C,T | 0.9798 | 0.994  | 0.313  | 0.7602 | 0.8431 |
| rs9369607       | 6 | 12846847 | T,A | 0.923  | 0.9326 | 0.175  | 0.7615 | 0.8279 |
| rs10498681      | 6 | 12808284 | C,T | 0.9254 | 0.8369 | 0.188  | 0.7616 | 0.8389 |
| rs3778646       | 6 | 13182685 | G,T | 0.7957 | 0.7299 | 0.155  | 0.7618 | 0.493  |
| rs16873682      | 6 | 13178390 | A,G | 0.7959 | 0.7268 | 0.155  | 0.7623 | 0.4936 |
| rs12527257      | 6 | 13178069 | T,C | 0.7944 | 0.7322 | 0.153  | 0.7642 | 0.4945 |
| rs9381809       | 6 | 13182117 | G,C | 0.7954 | 0.7386 | 0.152  | 0.7653 | 0.4961 |
| rs73362169      | 6 | 12897549 | C,T | 0.9756 | 0.8111 | 0.298  | 0.7708 | 0.7876 |
| rs9381451       | 6 | 12863621 | T,C | 0.9198 | 0.9256 | 0.164  | 0.7743 | 0.8298 |
| rs4711856       | 6 | 12872477 | G,A | 0.9765 | 0.8663 | 0.29   | 0.7769 | 0.7625 |
| rs9463117       | 6 | 12796984 | A,G | 0.9224 | 0.7246 | 0.186  | 0.777  | 0.9179 |
| rs12528399      | 6 | 13177901 | G,T | 0.7932 | 0.7355 | 0.143  | 0.7773 | 0.5059 |
| rs4097413       | 6 | 13178610 | A,G | 0.7935 | 0.7398 | 0.143  | 0.7774 | 0.5058 |
| rs9463119       | 6 | 12797496 | A,G | 0.9224 | 0.7262 | 0.185  | 0.7777 | 0.9184 |
| rs12525210      | 6 | 12782675 | G,A | 0.9231 | 0.6851 | 0.191  | 0.7781 | 0.9176 |
| rs9463105       | 6 | 12777790 | C,A | 0.9239 | 0.6479 | 0.197  | 0.7784 | 0.9194 |
| rs55764622      | 6 | 12784847 | T,A | 0.9229 | 0.6901 | 0.19   | 0.7785 | 0.9194 |
| rs9369612       | 6 | 12853192 | T,C | 0.9208 | 0.9152 | 0.162  | 0.7785 | 0.8292 |
| rs12528721      | 6 | 12782518 | C,G | 0.9232 | 0.6845 | 0.191  | 0.7786 | 0.9184 |
| rs9472549       | 6 | 12786237 | C,A | 0.9229 | 0.6955 | 0.189  | 0.7788 | 0.9198 |
| rs9472520       | 6 | 12777828 | A,G | 0.9239 | 0.6485 | 0.197  | 0.7789 | 0.9199 |
| rs2015761       | 6 | 12788243 | A,C | 0.9228 | 0.7017 | 0.188  | 0.779  | 0.9195 |
| rs9381807       | 6 | 13179394 | G,A | 0.7935 | 0.7458 | 0.141  | 0.779  | 0.5071 |
| rs9472528       | 6 | 12781353 | A,G | 0.9232 | 0.6818 | 0.191  | 0.779  | 0.92   |
| rs9472519       | 6 | 12777723 | A,G | 0.9246 | 0.641  | 0.197  | 0.7805 | 0.9165 |
| rs9463114       | 6 | 12794542 | G,A | 0.9231 | 0.7106 | 0.185  | 0.7811 | 0.9167 |
| rs75506162      | 6 | 12855702 | C,T | 0.921  | 0.9152 | 0.16   | 0.7819 | 0.8314 |
| rs4714931       | 6 | 12857408 | A,G | 0.9209 | 0.9146 | 0.159  | 0.7827 | 0.8323 |
| rs73722845      | 6 | 12789323 | G,A | 0.9246 | 0.6917 | 0.187  | 0.7834 | 0.9114 |
| rs73722844      | 6 | 12789322 | T,C | 0.9246 | 0.6914 | 0.187  | 0.7835 | 0.9113 |
| rs9463140       | 6 | 12804870 | A,G | 0.9208 | 0.7728 | 0.172  | 0.7849 | 0.9211 |
| rs9472566       | 6 | 12797940 | C,T | 0.9216 | 0.7202 | 0.179  | 0.7852 | 0.924  |
| 6:12889973:CT_C | 6 | 12889973 | R,D | 0.9793 | 0.9097 | 0.279  | 0.7922 | 0.8065 |
| rs55908560      | 6 | 12882732 | C,T | 0.9761 | 0.8353 | 0.237  | 0.8183 | 0.7828 |
| rs9463511       | 6 | 13178259 | G,A | 0.7174 | 0.6374 | 0.111  | 0.821  | 0.5261 |
| rs10948524      | 6 | 13188493 | A,G | 0.7674 | 0.8039 | 0.102  | 0.8267 | 0.5209 |
| rs9367369       | 6 | 13189941 | A,G | 0.7668 | 0.7946 | 0.102  | 0.8272 | 0.5207 |
| rs3823445       | 6 | 13182995 | G,A | 0.7697 | 0.8447 | 0.099  | 0.8276 | 0.5217 |
| rs9381812       | 6 | 13183998 | A,G | 0.7691 | 0.8415 | 0.098  | 0.83   | 0.5233 |
| rs9381810       | 6 | 13183121 | T,C | 0.7692 | 0.8459 | 0.097  | 0.8313 | 0.5246 |
| rs9367368       | 6 | 13189275 | T,C | 0.7644 | 0.7857 | 0.098  | 0.834  | 0.5236 |
| rs17617584      | 6 | 12882064 | A,G | 0.9747 | 0.79   | 0.195  | 0.8506 | 0.7383 |
| 6:12775414:AT_A | 6 | 12775414 | R,D | 0.6385 | 0.6408 | -0.065 | 0.859  | 0.417  |
| rs6941624       | 6 | 12775930 | T,C | 0.6382 | 0.6436 | -0.064 | 0.859  | 0.4175 |
| rs59802022      | 6 | 12882105 | C,A | 0.9742 | 0.7765 | 0.182  | 0.8604 | 0.7367 |
| rs2876298       | 6 | 12800727 | C,A | 0.8933 | 0.6857 | 0.095  | 0.8658 | 0.7929 |
| rs9367253       | 6 | 12888047 | A,T | 0.8948 | 0.605  | 0.084  | 0.8775 | 0.5099 |
| rs10948235      | 6 | 12770823 | T,C | 0.6381 | 0.6218 | -0.054 | 0.8824 | 0.4283 |
| rs950720        | 6 | 12773990 | C,T | 0.6385 | 0.6312 | -0.054 | 0.8824 | 0.4283 |
| rs9395520       | 6 | 13183523 | C,T | 0.7395 | 0.9769 | 0.059  | 0.8857 | 0.5716 |

|                 |   |          |     |        |        |        |        |        |
|-----------------|---|----------|-----|--------|--------|--------|--------|--------|
| rs9296494       | 6 | 12859886 | A,G | 0.6196 | 1      | -0.042 | 0.8899 | 0.4236 |
| rs9395190       | 6 | 12860080 | T,C | 0.6196 | 1      | -0.042 | 0.8899 | 0.4236 |
| rs6921974       | 6 | 12865376 | T,C | 0.6197 | 1      | -0.042 | 0.8902 | 0.4238 |
| rs9381456       | 6 | 12865148 | A,G | 0.6197 | 1      | -0.042 | 0.8902 | 0.4238 |
| rs11757278      | 6 | 13180454 | T,C | 0.7398 | 1      | 0.052  | 0.8958 | 0.5781 |
| rs6914513       | 6 | 12805843 | C,T | 0.5802 | 0.7623 | 0.039  | 0.9014 | 0.5452 |
| rs6901070       | 6 | 12865243 | G,A | 0.6233 | 0.9985 | -0.035 | 0.9095 | 0.4635 |
| rs16873383      | 6 | 12800443 | A,T | 0.6341 | 0.7955 | -0.03  | 0.9254 | 0.447  |
| rs7758513       | 6 | 12777571 | C,T | 0.6451 | 0.6492 | -0.032 | 0.9288 | 0.4505 |
| rs9463138       | 6 | 12803792 | A,G | 0.6386 | 0.8107 | -0.028 | 0.9292 | 0.4245 |
| rs11758650      | 6 | 12778109 | C,A | 0.6415 | 0.6652 | -0.031 | 0.9298 | 0.4467 |
| rs11753864      | 6 | 12778218 | G,A | 0.6419 | 0.6657 | -0.031 | 0.9302 | 0.447  |
| rs7776079       | 6 | 12819572 | A,G | 0.5346 | 0.9747 | 0.023  | 0.9338 | 0.5415 |
| rs9472590       | 6 | 12801104 | C,G | 0.6352 | 0.803  | -0.027 | 0.9341 | 0.4493 |
| rs4714930       | 6 | 12852478 | T,G | 0.5529 | 0.965  | 0.024  | 0.9343 | 0.6214 |
| rs9472583       | 6 | 12799417 | C,A | 0.6354 | 0.7979 | -0.026 | 0.9346 | 0.4495 |
| rs12523719      | 6 | 12800824 | T,G | 0.6353 | 0.8015 | -0.026 | 0.9348 | 0.4496 |
| rs12530186      | 6 | 12800690 | T,C | 0.6353 | 0.8007 | -0.026 | 0.9348 | 0.4495 |
| rs1412749       | 6 | 12774363 | C,G | 0.5627 | 0.6558 | 0.028  | 0.935  | 0.5115 |
| rs9472587       | 6 | 12800874 | A,T | 0.6353 | 0.8023 | -0.026 | 0.9352 | 0.4499 |
| rs13203883      | 6 | 12802560 | T,C | 0.6365 | 0.804  | -0.025 | 0.9372 | 0.4528 |
| rs7760286       | 6 | 12810937 | A,G | 0.634  | 0.8576 | -0.024 | 0.9373 | 0.4557 |
| 6:12785347:AC_A | 6 | 12785347 | R,D | 0.6387 | 0.7144 | -0.026 | 0.9381 | 0.4532 |
| rs7760140       | 6 | 12782968 | G,T | 0.639  | 0.7074 | -0.026 | 0.9387 | 0.4533 |
| rs1412738       | 6 | 12805995 | A,G | 0.6346 | 0.8275 | -0.024 | 0.9388 | 0.4552 |
| rs12524974      | 6 | 12784785 | A,G | 0.6387 | 0.7119 | -0.026 | 0.9389 | 0.4537 |
| rs9296464       | 6 | 12784293 | T,C | 0.6389 | 0.7091 | -0.026 | 0.9389 | 0.4537 |
| rs7747656       | 6 | 12790872 | A,G | 0.6378 | 0.7421 | -0.025 | 0.9398 | 0.4495 |
| rs6913075       | 6 | 12805821 | G,C | 0.6339 | 0.8292 | -0.024 | 0.9402 | 0.4543 |
| rs1953089       | 6 | 12804619 | C,T | 0.6339 | 0.8238 | -0.024 | 0.9407 | 0.4544 |
| rs6916334       | 6 | 12801594 | G,T | 0.6347 | 0.8069 | -0.024 | 0.9407 | 0.4542 |
| rs4714870       | 6 | 12797055 | T,G | 0.6363 | 0.7584 | -0.024 | 0.9409 | 0.4519 |
| rs6930873       | 6 | 12805039 | A,T | 0.6338 | 0.8266 | -0.023 | 0.941  | 0.4544 |
| rs9472594       | 6 | 12803223 | C,A | 0.6343 | 0.8157 | -0.024 | 0.941  | 0.4544 |
| rs9472595       | 6 | 12803718 | C,T | 0.6341 | 0.8193 | -0.023 | 0.941  | 0.4542 |
| rs13214313      | 6 | 12802428 | G,A | 0.6345 | 0.8109 | -0.024 | 0.9411 | 0.4543 |
| rs2327619       | 6 | 12790353 | G,A | 0.6374 | 0.7405 | -0.025 | 0.9411 | 0.4516 |
| rs9463137       | 6 | 12803582 | G,T | 0.6342 | 0.8181 | -0.023 | 0.9411 | 0.4544 |
| rs1412752       | 6 | 12788776 | A,T | 0.6373 | 0.7344 | -0.025 | 0.9412 | 0.452  |
| rs6909834       | 6 | 12805582 | C,T | 0.6337 | 0.8283 | -0.023 | 0.9412 | 0.4545 |
| rs9472558       | 6 | 12789655 | C,T | 0.6372 | 0.7381 | -0.025 | 0.9413 | 0.4518 |
| rs10948247      | 6 | 12786511 | C,A | 0.6379 | 0.7251 | -0.025 | 0.9415 | 0.452  |
| rs28451666      | 6 | 12802374 | G,A | 0.6346 | 0.8089 | -0.023 | 0.9415 | 0.4549 |
| rs6458473       | 6 | 12804934 | G,C | 0.6338 | 0.8262 | -0.023 | 0.9415 | 0.4547 |
| rs1412753       | 6 | 12791207 | G,C | 0.6373 | 0.7438 | -0.024 | 0.9417 | 0.4521 |
| rs9463136       | 6 | 12803416 | T,C | 0.6343 | 0.8173 | -0.023 | 0.9417 | 0.4548 |
| rs7757835       | 6 | 12798443 | A,G | 0.6364 | 0.7627 | -0.024 | 0.9421 | 0.4523 |
| rs883947        | 6 | 12787714 | C,T | 0.6378 | 0.7287 | -0.024 | 0.9423 | 0.4527 |
| rs9463134       | 6 | 12802815 | G,C | 0.635  | 0.8112 | -0.023 | 0.9423 | 0.4544 |
| rs6935309       | 6 | 12804882 | T,C | 0.6366 | 0.8148 | -0.022 | 0.9437 | 0.4598 |
| rs13203774      | 6 | 12802502 | T,C | 0.6352 | 0.8095 | -0.022 | 0.9445 | 0.4561 |
| rs2095123       | 6 | 12790079 | A,G | 0.6355 | 0.7357 | -0.023 | 0.9457 | 0.4506 |
| rs7762417       | 6 | 12807829 | C,T | 0.6324 | 0.8341 | -0.021 | 0.9458 | 0.454  |
| rs9296465       | 6 | 12784464 | A,G | 0.5628 | 0.7232 | 0.021  | 0.9475 | 0.5079 |
| rs6458461       | 6 | 12789191 | C,T | 0.5601 | 0.751  | 0.021  | 0.9478 | 0.5062 |
| rs944766        | 6 | 12787449 | C,T | 0.5607 | 0.7424 | 0.021  | 0.9479 | 0.5061 |

|                 |   |          |     |        |        |        |        |        |
|-----------------|---|----------|-----|--------|--------|--------|--------|--------|
| rs4714868       | 6 | 12791878 | T,C | 0.5595 | 0.7612 | 0.021  | 0.9482 | 0.506  |
| rs6924150       | 6 | 12795621 | C,T | 0.559  | 0.7689 | 0.02   | 0.9482 | 0.506  |
| rs6458460       | 6 | 12789038 | C,A | 0.5581 | 0.75   | 0.021  | 0.9483 | 0.5055 |
| rs9472551       | 6 | 12786272 | C,A | 0.5608 | 0.7394 | 0.021  | 0.9483 | 0.5058 |
| 6:12788487:TA_T | 6 | 12788487 | R,D | 0.5584 | 0.7483 | 0.021  | 0.9484 | 0.5055 |
| rs4714866       | 6 | 12791802 | G,A | 0.5595 | 0.7608 | 0.02   | 0.9484 | 0.5058 |
| rs7757858       | 6 | 12798477 | A,C | 0.5583 | 0.7789 | 0.02   | 0.9485 | 0.5058 |
| rs2015764       | 6 | 12788283 | G,A | 0.5606 | 0.7468 | 0.021  | 0.9487 | 0.5052 |
| rs1412751       | 6 | 12787247 | G,A | 0.5608 | 0.7405 | 0.021  | 0.9489 | 0.5053 |
| rs1572000       | 6 | 12769487 | G,A | 0.5732 | 0.6321 | 0.022  | 0.9493 | 0.4976 |
| rs9463110       | 6 | 12782602 | T,G | 0.5622 | 0.7202 | 0.02   | 0.9512 | 0.5071 |
| rs6919327       | 6 | 12803410 | A,G | 0.5538 | 0.8326 | 0.018  | 0.9521 | 0.5067 |
| rs7762547       | 6 | 12807877 | C,A | 0.5538 | 0.8565 | 0.018  | 0.9521 | 0.5068 |
| 6:12796108:AT_A | 6 | 12796108 | R,D | 0.5579 | 0.7665 | 0.018  | 0.9534 | 0.5051 |
| rs7757205       | 6 | 12777449 | G,A | 0.5688 | 0.6636 | 0.019  | 0.9557 | 0.5054 |
| 6:12801131:G_GA | 6 | 12801131 | R,I | 0.6522 | 0.6861 | -0.019 | 0.9565 | 0.4201 |
| rs17617207      | 6 | 12800332 | G,A | 0.5549 | 0.8151 | 0.016  | 0.9576 | 0.502  |
| rs6922969       | 6 | 12780032 | T,C | 0.5633 | 0.7106 | 0.017  | 0.958  | 0.5016 |
| rs9463106       | 6 | 12778864 | G,A | 0.5652 | 0.681  | 0.017  | 0.9591 | 0.5009 |
| rs6938417       | 6 | 12780185 | G,A | 0.5632 | 0.712  | 0.017  | 0.9593 | 0.5008 |
| rs1572002       | 6 | 12780990 | G,A | 0.5631 | 0.7143 | 0.017  | 0.9595 | 0.501  |
| rs6941422       | 6 | 12775753 | T,C | 0.5675 | 0.6637 | 0.017  | 0.9606 | 0.5008 |
| rs9296487       | 6 | 12849031 | T,C | 0.5279 | 0.9772 | -0.014 | 0.9606 | 0.4209 |
| rs7764490       | 6 | 12817237 | A,G | 0.5445 | 0.9558 | 0.014  | 0.9614 | 0.522  |
| rs10948244      | 6 | 12786085 | T,C | 0.6628 | 0.6998 | 0.013  | 0.9696 | 0.4873 |
| rs6917493       | 6 | 12801488 | C,G | 0.6533 | 0.7413 | -0.011 | 0.9732 | 0.4595 |
| rs2327617       | 6 | 12785023 | C,T | 0.6488 | 0.6621 | -0.012 | 0.9738 | 0.4807 |
| rs6917492       | 6 | 12801487 | C,T | 0.6523 | 0.7449 | -0.01  | 0.9756 | 0.4602 |
| rs1332840       | 6 | 12818865 | G,C | 0.5421 | 0.9674 | 0.008  | 0.9765 | 0.5251 |
| rs1412740       | 6 | 12817590 | A,G | 0.5444 | 0.9603 | 0.008  | 0.9767 | 0.5268 |
| rs9472752       | 6 | 12864134 | T,C | 0.5402 | 0.9759 | 0.008  | 0.9796 | 0.5187 |
| rs2026457       | 6 | 12825805 | G,A | 0.54   | 1      | 0.007  | 0.9801 | 0.5233 |
| rs9349344       | 6 | 12826479 | T,C | 0.5395 | 1      | 0.006  | 0.983  | 0.5222 |
| rs9296495       | 6 | 12865649 | G,A | 0.5391 | 0.9937 | 0.005  | 0.9873 | 0.5147 |
| rs9395172       | 6 | 12850534 | G,A | 0.5398 | 0.99   | 0.004  | 0.9884 | 0.5155 |
| rs6917097       | 6 | 12851768 | T,C | 0.5398 | 0.9893 | 0.004  | 0.9887 | 0.5152 |
| rs9349346       | 6 | 12827334 | A,T | 0.5238 | 0.9776 | -0.004 | 0.9903 | 0.4364 |
| rs9381391       | 6 | 12781416 | C,T | 0.5332 | 0.7294 | 0.004  | 0.9904 | 0.3887 |
| rs6915402       | 6 | 12821491 | A,T | 0.5341 | 0.9645 | 0.003  | 0.9911 | 0.4991 |
| rs7454135       | 6 | 12855542 | T,G | 0.5405 | 0.9913 | 0.002  | 0.9934 | 0.5121 |
| rs13196135      | 6 | 12804875 | G,A | 0.6561 | 0.788  | 0.002  | 0.9945 | 0.4749 |



**Supplemental Figure I.** Expression of genes located 1-megabase on either side of *PHACTR1*-rs9349379 in right coronary arteries from 25 human donors. We did not measure the expression of a pseudogene or predicted non-coding RNA within the locus. We used linear regression to test the association between genotypes at rs9349379 and gene expression levels. We did not detect significant cis-eQTL effect for these eight genes. **(A)** EDN1. **(B)** GFOD1. **(C)** HIVEP1. **(D)** MCUR1. **(E)** NOL7. **(F)** RanBP9. **(G)** SIRT5. **(H)** TBC1D7.

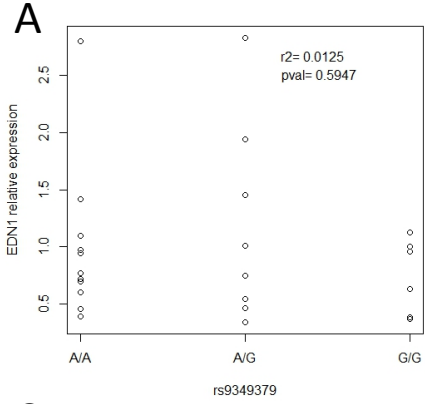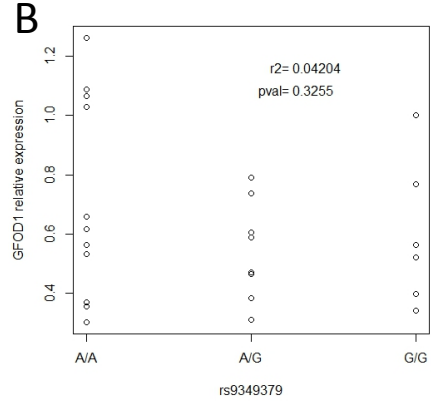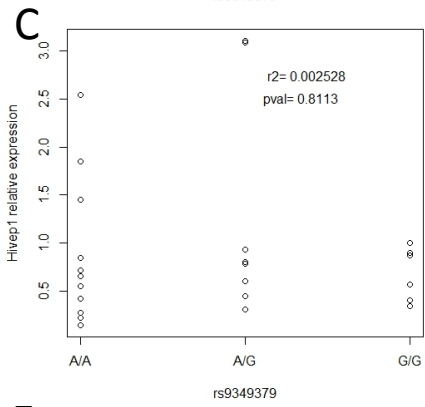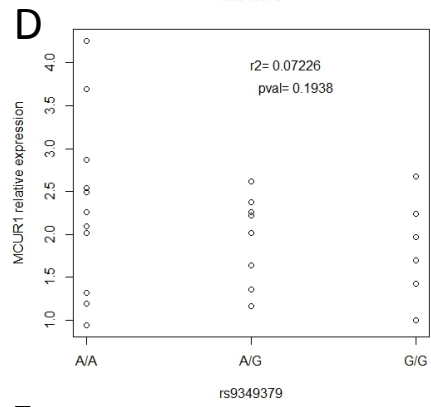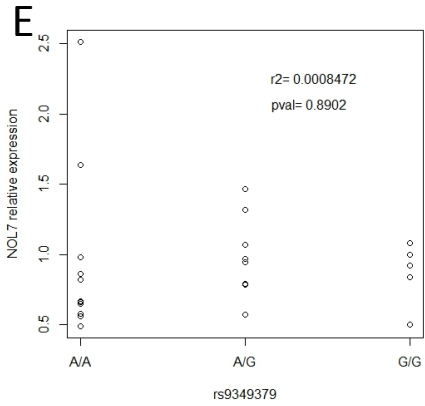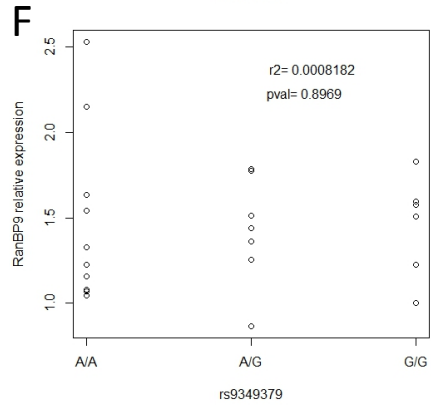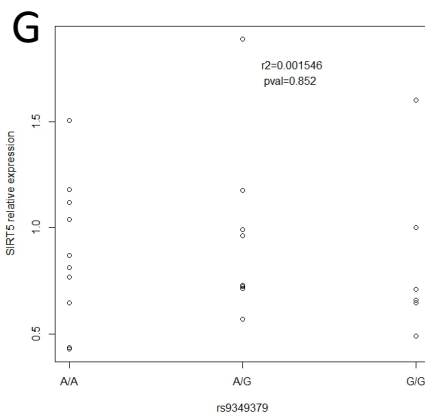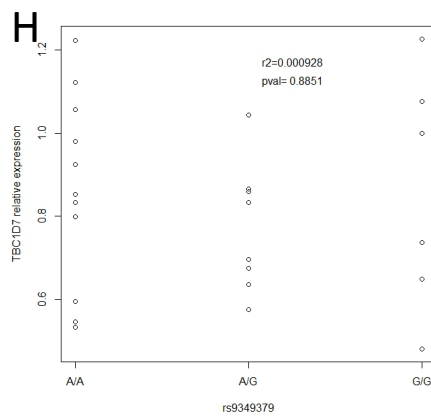

**Supplemental Figure II.** The anti-MEF2 antibody (Santa Cruz-313) preferentially recognizes MEF2A in HUVEC. **(A)** We used siRNA to knockdown the expression of *MEF2A* and *MEF2C* in HUVEC, and measured transcript levels by real-time PCR. We reduced the expression of *MEF2A* by 65% and the expression of *MEF2C* by 80%. There is no non-specific knockdown of the other *MEF2* transcript (e.g. when we knockdown *MEF2A*, the levels of *MEF2C* do not change). **(B)** At the protein levels, the knockdown of *MEF2A*, but not *MEF2C*, reduces the Western blot signal of the protein detected by the anti-MEF2 antibody.

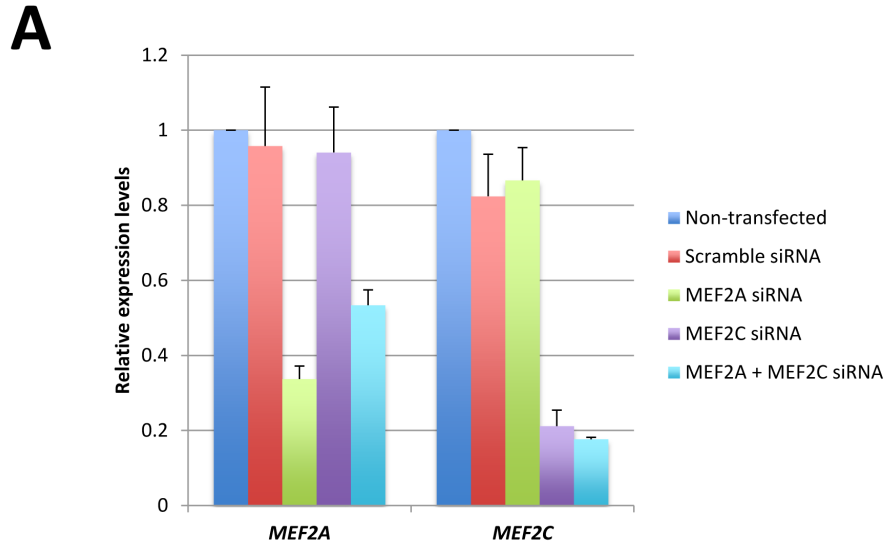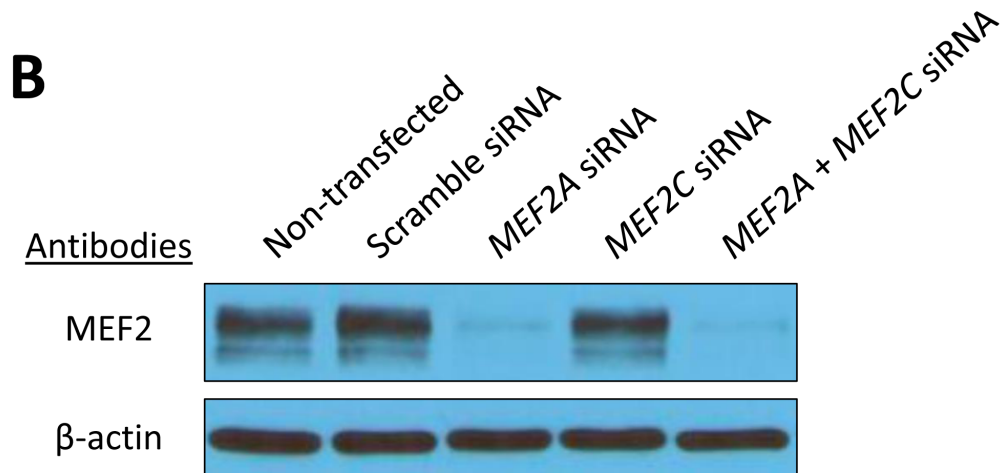

**Supplemental Figure III.** VEGF treatment activates ERK/MAPK. Experiment to demonstrate that HUVEC used in our experiments respond to VEGF treatment, as demonstrated by the phosphorylation of ERK (p42/p44). HUVEC cells were serum-starved overnight and treated with VEGF at 20ng/mL for five minutes before preparing the protein extracts. Different times (5-60 min) or VEGF concentration (2-100ng/mL) had no impact on *PHACTR1* expression levels.  $\beta$ -actin is the loading control. PHACTR1 is the lower band in the doublet, as indicated by the arrowhead. These results come from the same experiment and gel, but samples were loaded on non-consecutive lanes.

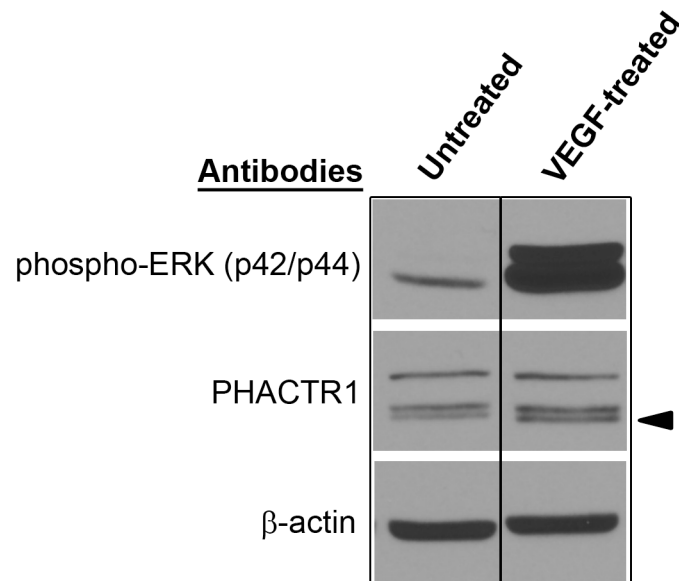

## Supplemental References

1. Purcell S, Neale B, Todd-Brown K, Thomas L, Ferreira MA, Bender D, Maller J, Sklar P, de Bakker PI, Daly MJ, Sham PC. Plink: A tool set for whole-genome association and population-based linkage analyses. *American journal of human genetics*. 2007;81:559-575
2. Rivas MA, Beaudoin M, Gardet A, et al. Deep resequencing of gwas loci identifies independent rare variants associated with inflammatory bowel disease. *Nature genetics*. 2011;43:1066-1073
3. Beaudoin M, Lo KS, N'Diaye A, Rivas MA, Dube MP, Laplante N, Phillips MS, Rioux JD, Tardif JC, Lettre G. Pooled DNA resequencing of 68 myocardial infarction candidate genes in french canadians. *Circulation. Cardiovascular genetics*. 2012;5:547-554
